# Supplementary material for: Development of Quinazolinone Derivatives as Modulators of Virulence Factors of Pseudomonas aeruginosa Cystic Fibrosis Strains
Source: MDPI journal article supplement (doi:10.3390/molecules28186535), 2023-09-09

## Supplementary Information for:

### Development of quinazolinone derivatives as modulators of virulence factors of *Pseudomonas aeruginosa* cystic fibrosis strains

#### CONTENTS

<sup>1</sup>H, <sup>13</sup>C NMR and HPLC/MS spectra of compound **7a**

<sup>1</sup>H, <sup>13</sup>C NMR and HPLC/MS spectra of compound **7b**

<sup>1</sup>H, <sup>13</sup>C NMR and HPLC/MS spectra of compound **7c**

<sup>1</sup>H, <sup>13</sup>C NMR and HPLC/MS spectra of compound **7d**

<sup>1</sup>H, <sup>13</sup>C NMR and HPLC/MS spectra of compound **8a**

<sup>1</sup>H, <sup>13</sup>C NMR and HPLC/MS spectra of compound **8b**

<sup>1</sup>H, <sup>13</sup>C NMR and HPLC/MS spectra of compound **9**

<sup>1</sup>H, <sup>13</sup>C NMR and HPLC/MS spectra of compound **10**

<sup>1</sup>H, <sup>13</sup>C NMR and HPLC/MS spectra of compound **11a**

<sup>1</sup>H, <sup>13</sup>C NMR and HPLC/MS spectra of compound **11b**

<sup>1</sup>H, <sup>13</sup>C NMR and HPLC/MS spectra of compound **11c**

<sup>1</sup>H, <sup>13</sup>C NMR and HPLC/MS spectra of compound **11d**

<sup>1</sup>H, <sup>13</sup>C NMR and HPLC/MS spectra of compound **11e**

<sup>1</sup>H, <sup>13</sup>C NMR and HPLC/MS spectra of compound **11f**

<sup>1</sup>H, <sup>13</sup>C NMR and HPLC/MS spectra of compound **22a**

<sup>1</sup>H, <sup>13</sup>C NMR and HPLC/MS spectra of compound **22b**

HRMS spectrum of compound **7a**

HRMS spectrum of compound **11a**

HRMS spectrum of compound **11b**

HRMS spectrum of compound **11c**

HRMS spectrum of compound **11d**

# <sup>1</sup>H, <sup>13</sup>C NMR and HPLC/MS spectra of compound 7a

MG044\_H-dmsd  
STANDARD FLUORINE PARAMETERS

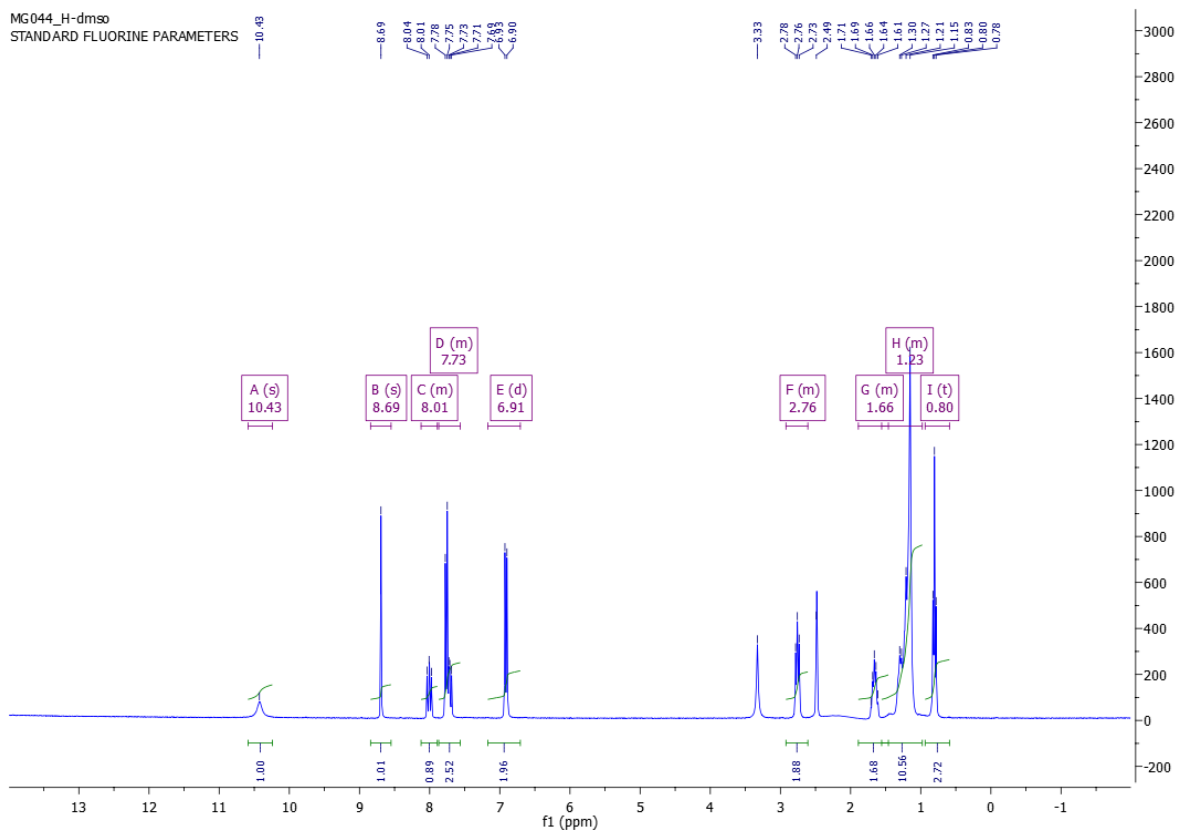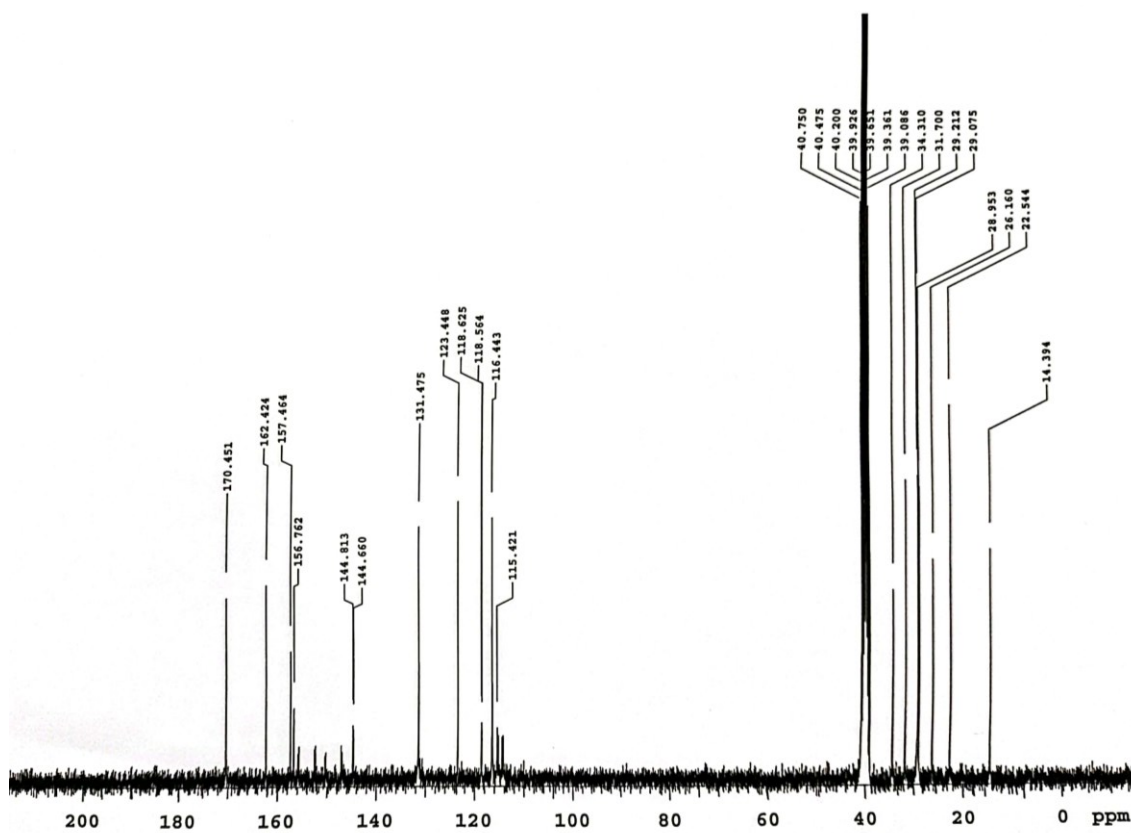

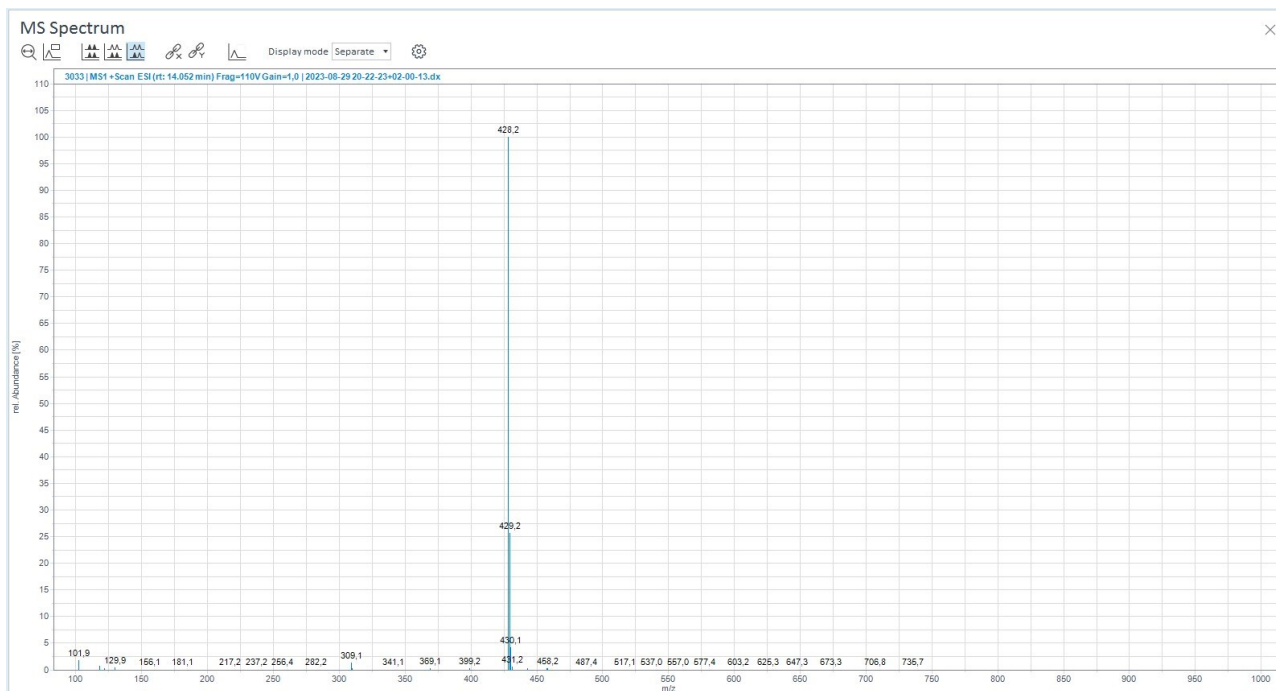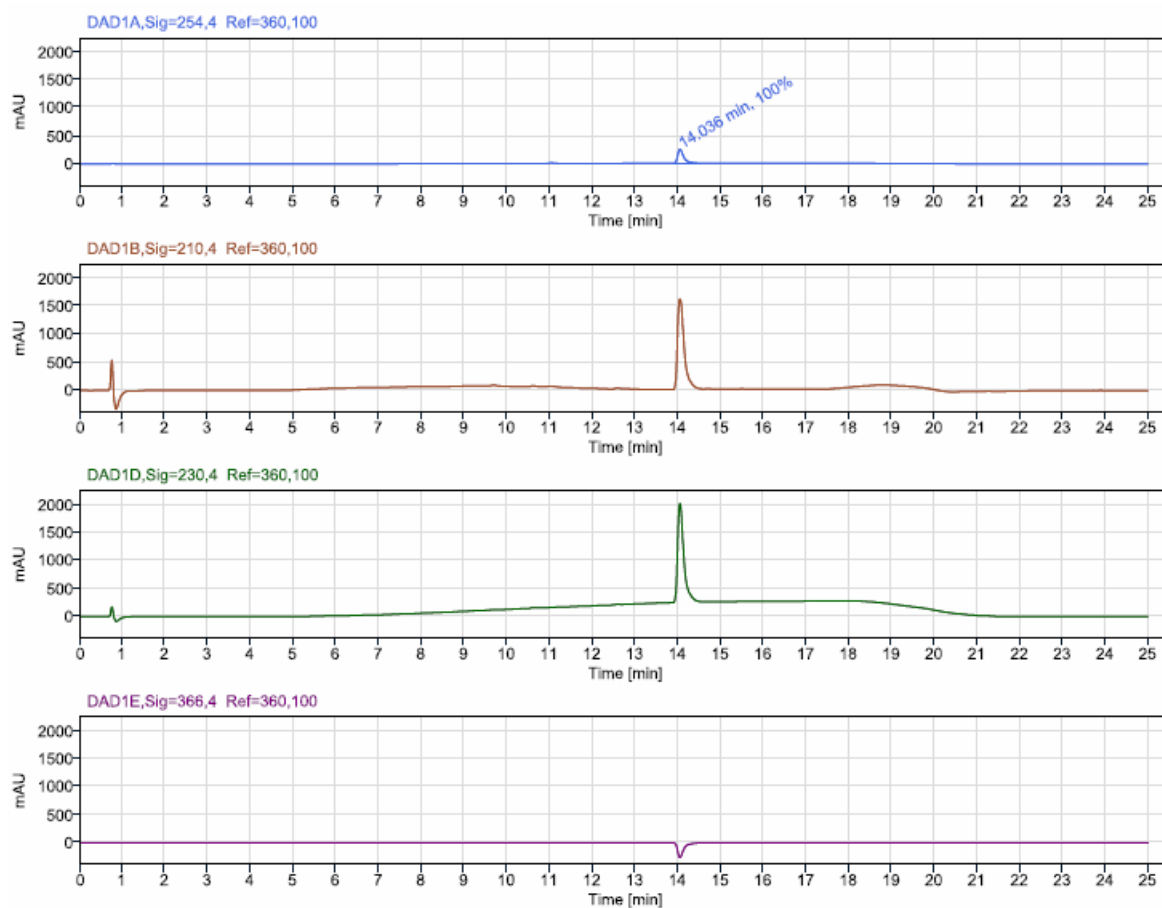

#### Peak Results (Area Percent at least 1%)

| RT (min) | Signal Description                    | Width (min) | Area       | Height   | Area%  |
|----------|---------------------------------------|-------------|------------|----------|--------|
| 14.036   | DAD1A, Sig=254,4 Ref=360,100          | 0.610       | 2456.4     | 246.2    | 100.00 |
| 14.056   | MS1 + TIC SCAN ESI Frag=110V Gain=1.0 | 0.792       | 17266573.7 | 992387.3 | 100.00 |

**<sup>1</sup>H, <sup>13</sup>C NMR and HPLC/MS spectra of compound 7b**

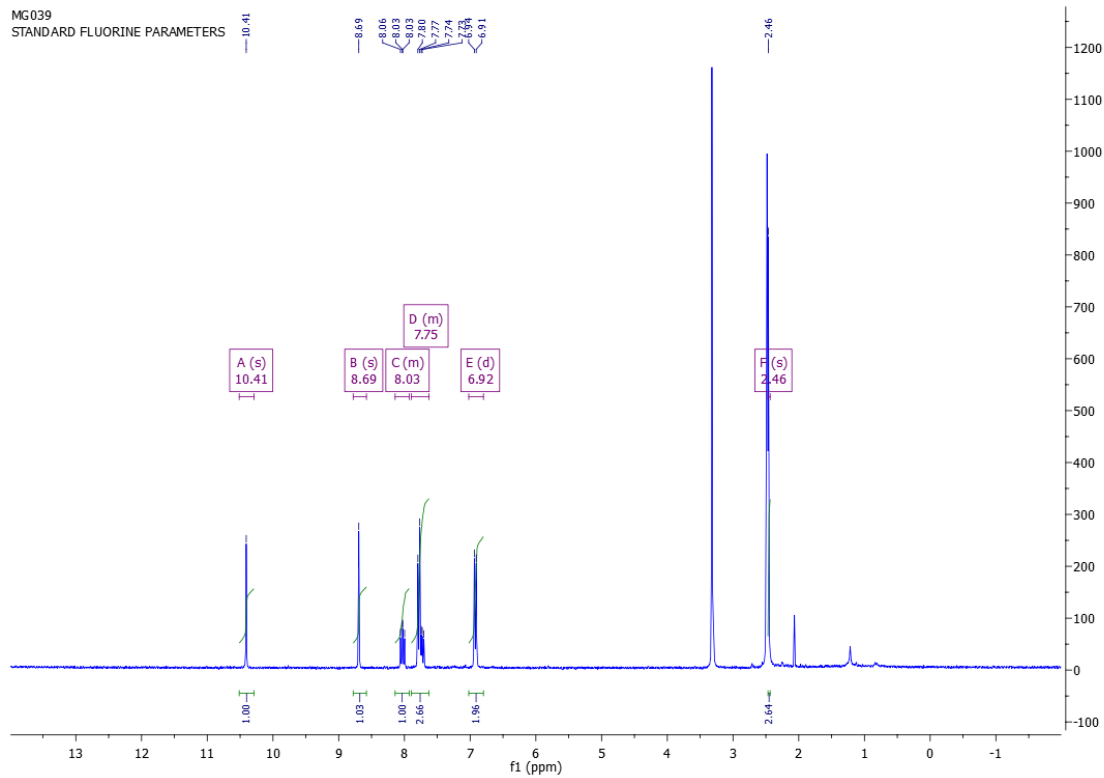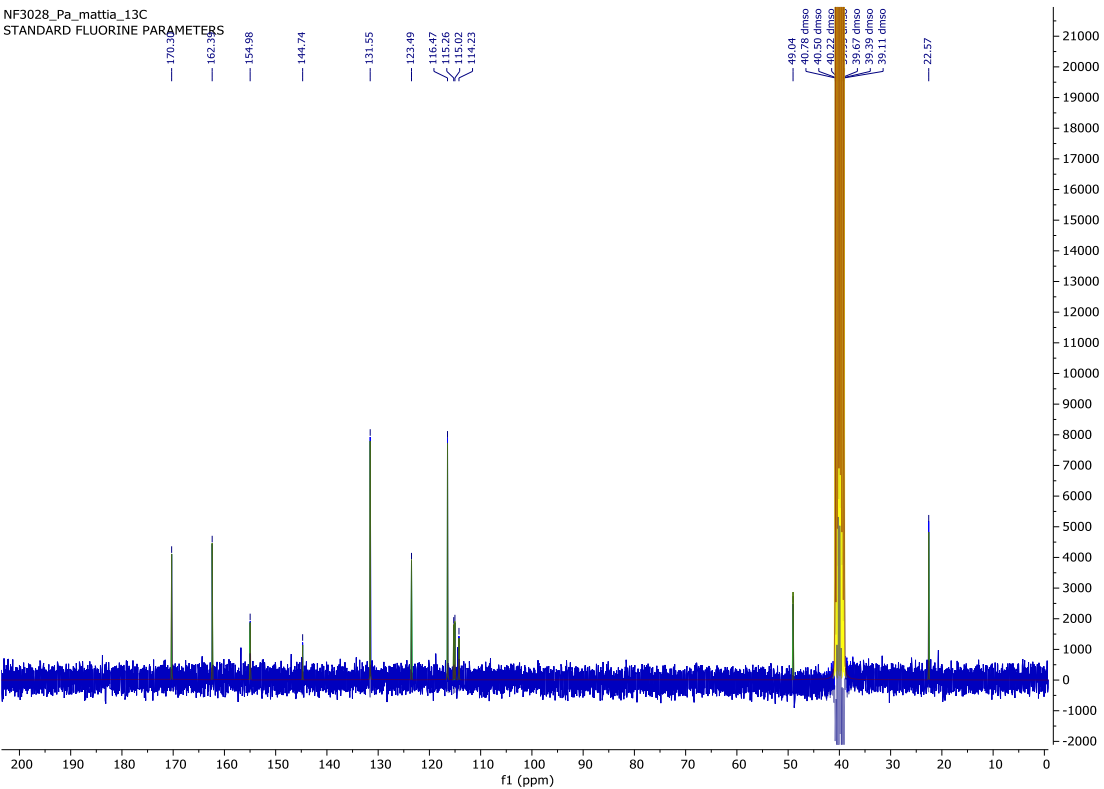

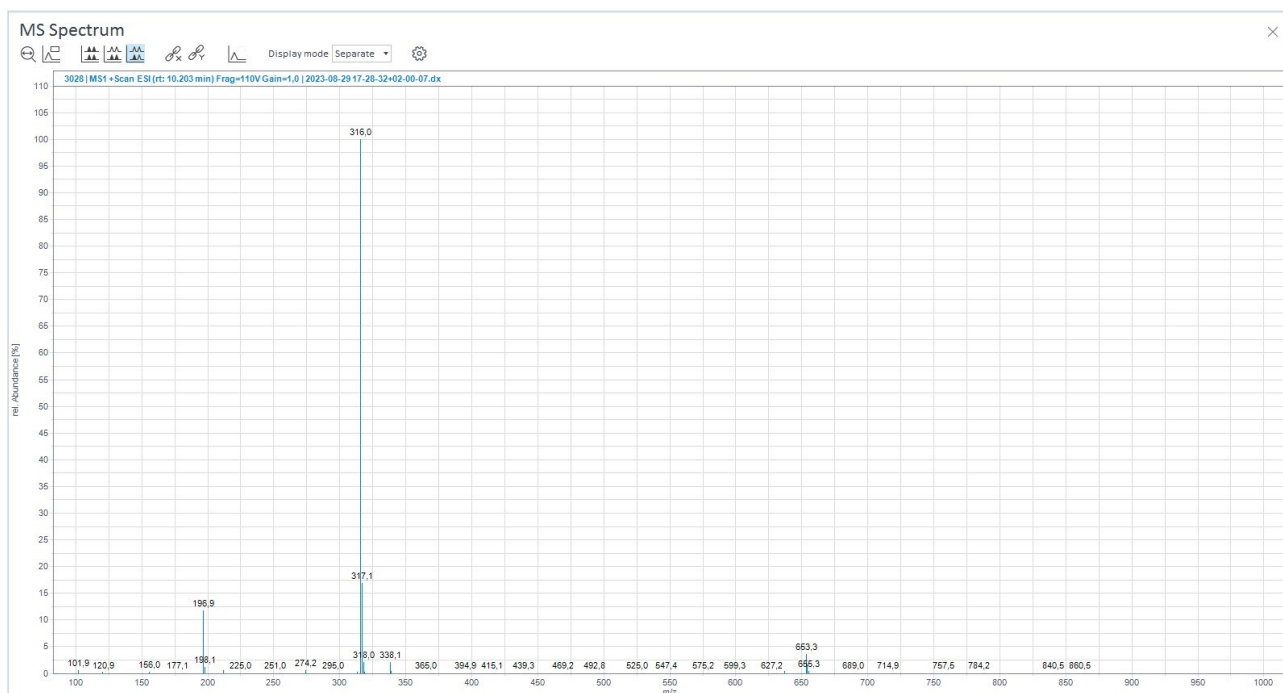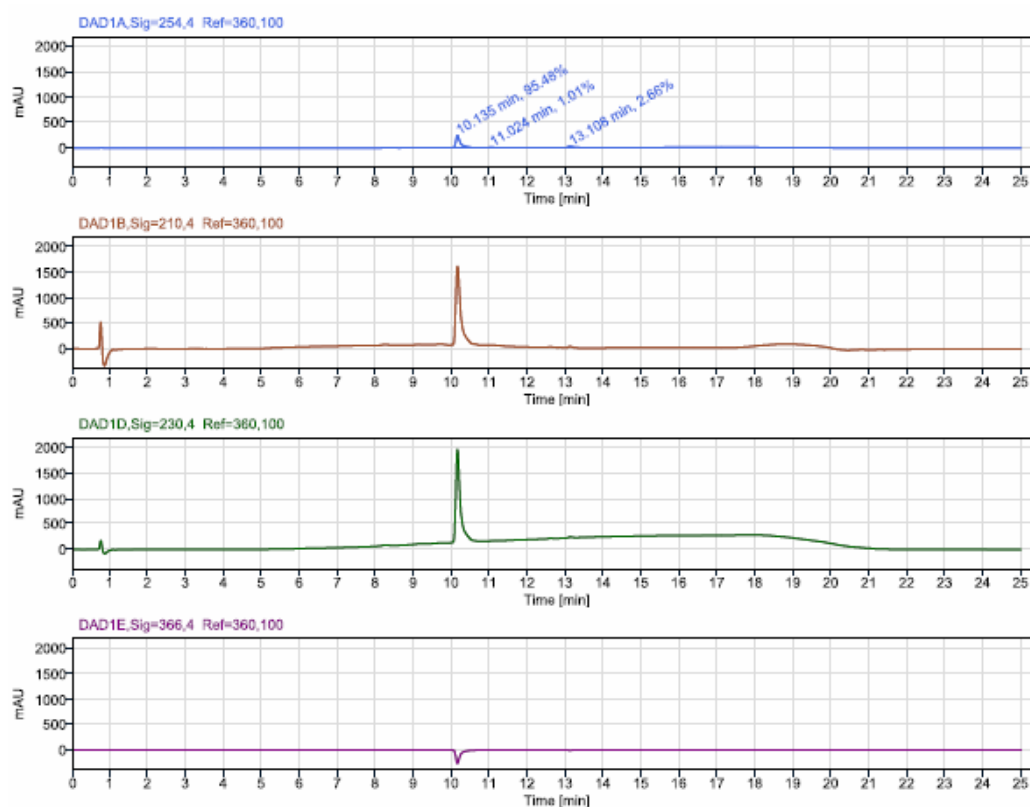

#### Peak Results (Area Percent at least 1%)

| RT (min) | Signal Description                   | Width (min) | Area       | Height    | Area%  |
|----------|--------------------------------------|-------------|------------|-----------|--------|
| 10.135   | DAD1A,Sig=254,4 Ref=360,100          | 0.957       | 2041,4     | 241,0     | 95,48  |
| 10.203   | MS1 +TIC SCAN ESI Frag=110V Gain=1.0 | 0.875       | 26574503,5 | 1687708,2 | 100,00 |
| 11.024   | DAD1A,Sig=254,4 Ref=360,100          | 0.134       | 21,5       | 4,4       | 1,01   |
| 13.108   | DAD1A,Sig=254,4 Ref=360,100          | 0.146       | 56,9       | 12,5      | 2,66   |

**<sup>1</sup>H, <sup>13</sup>C NMR and HPLC/MS spectra of compound 7c**

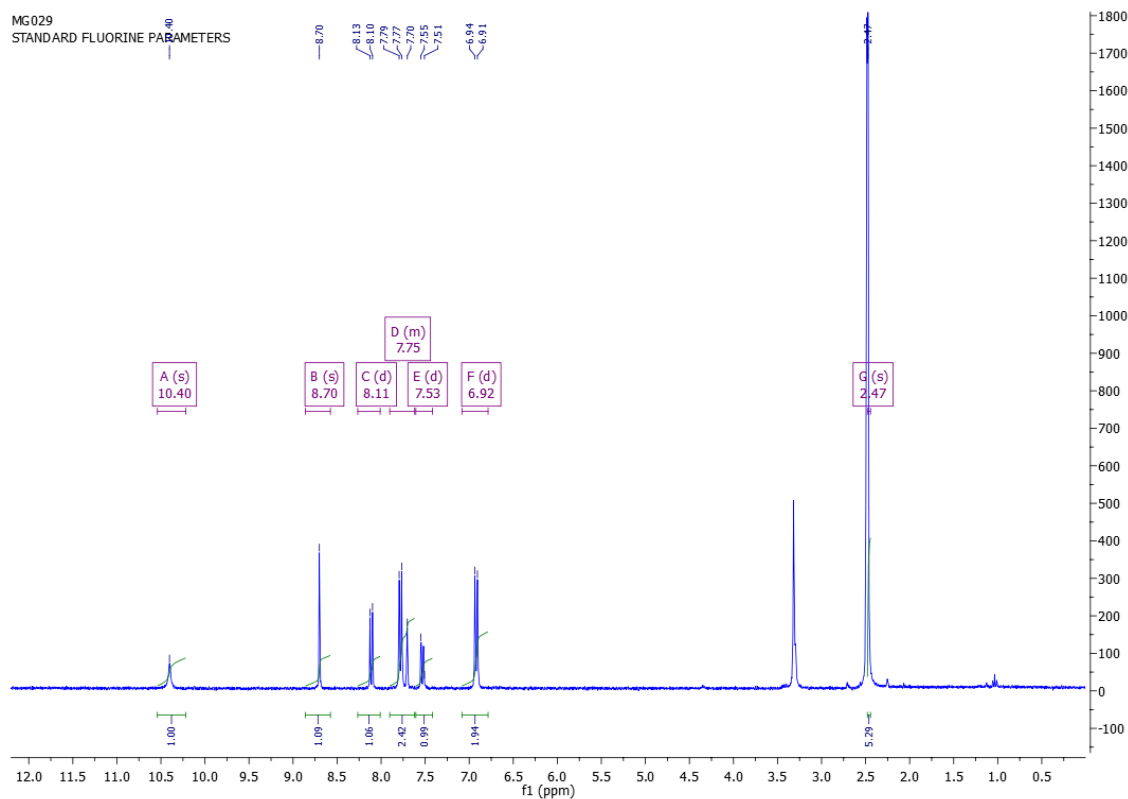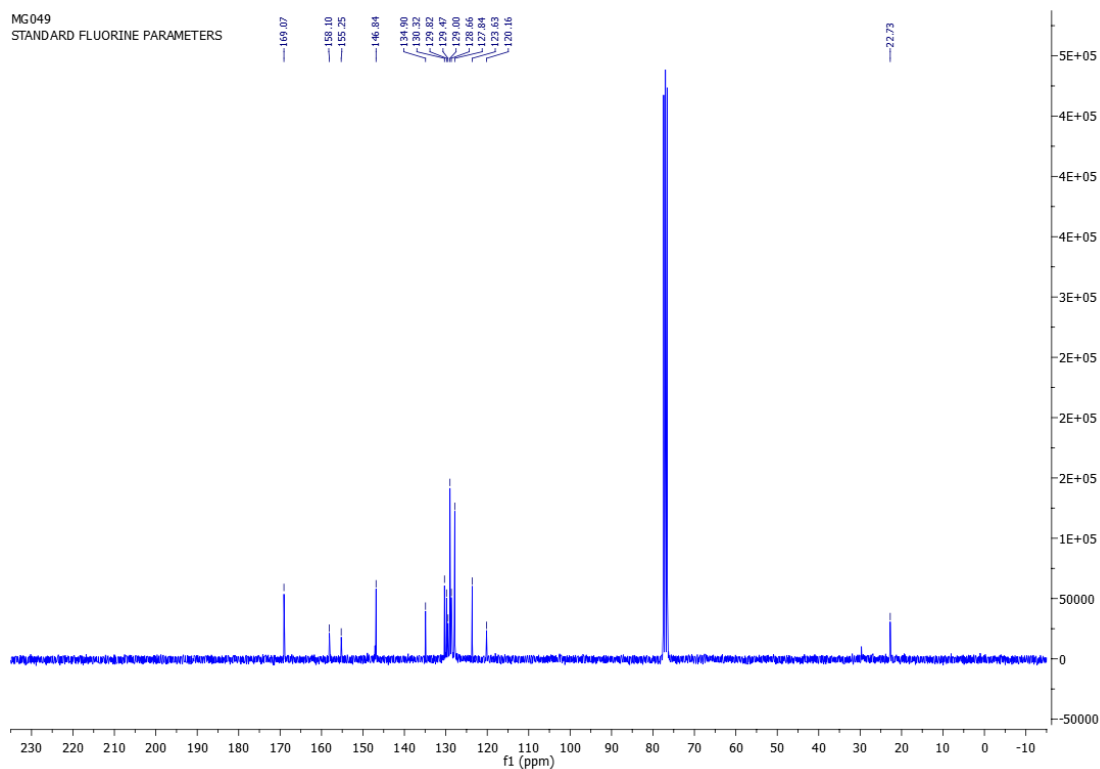

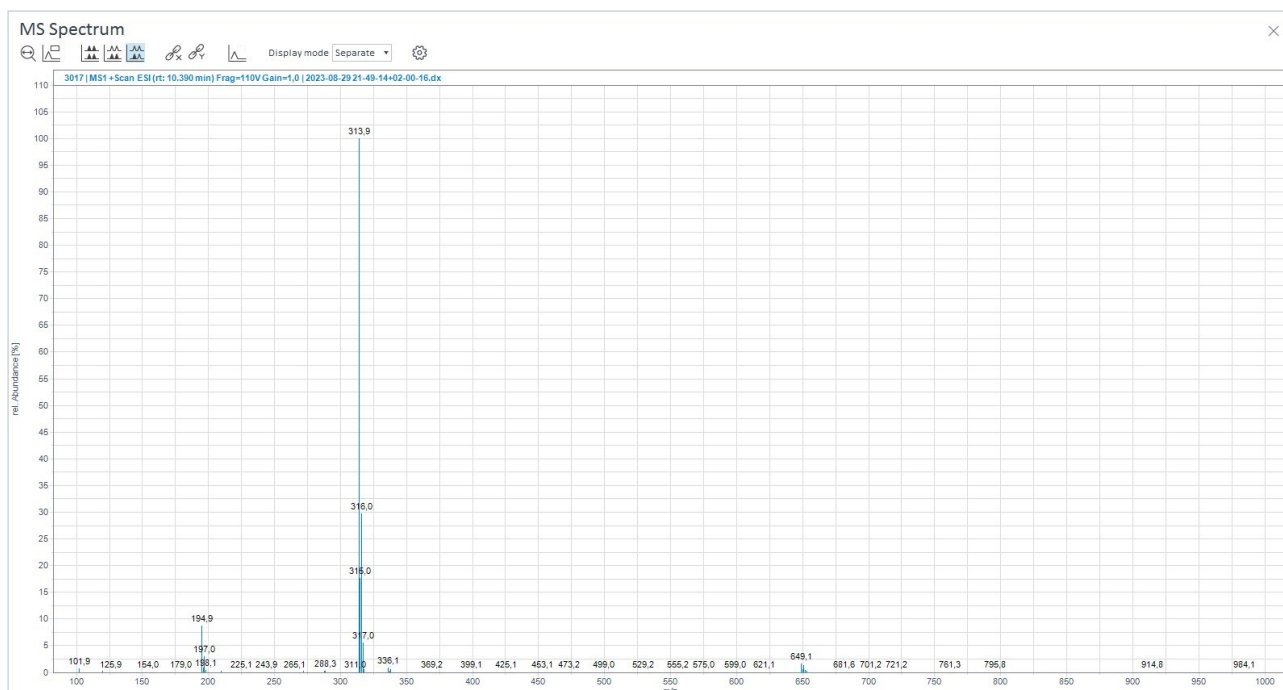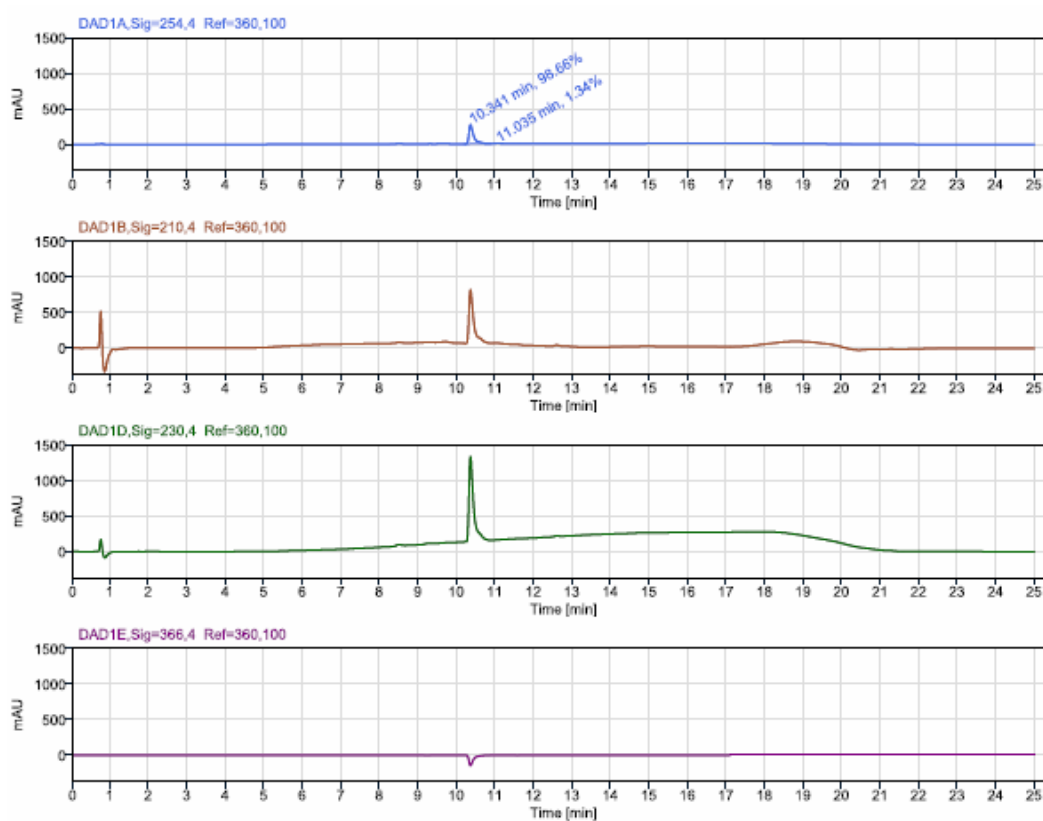

#### Peak Results (Area Percent at least 1%)

| RT (min) | Signal Description                   | Width (min) | Area       | Height    | Area%  |
|----------|--------------------------------------|-------------|------------|-----------|--------|
| 10.341   | DAD1A,Sig=254,4 Ref=360,100          | 0.700       | 2307,3     | 272,2     | 98,66  |
| 10.398   | MS1 +TIC SCAN ESI Frag=110V Gain=1.0 | 0.446       | 18242039,3 | 1526702,9 | 100,00 |
| 11.035   | DAD1A,Sig=254,4 Ref=360,100          | 0.198       | 31,3       | 4,7       | 1,34   |

**<sup>1</sup>H, <sup>13</sup>C NMR and HPLC/MS spectra of compound 7d**

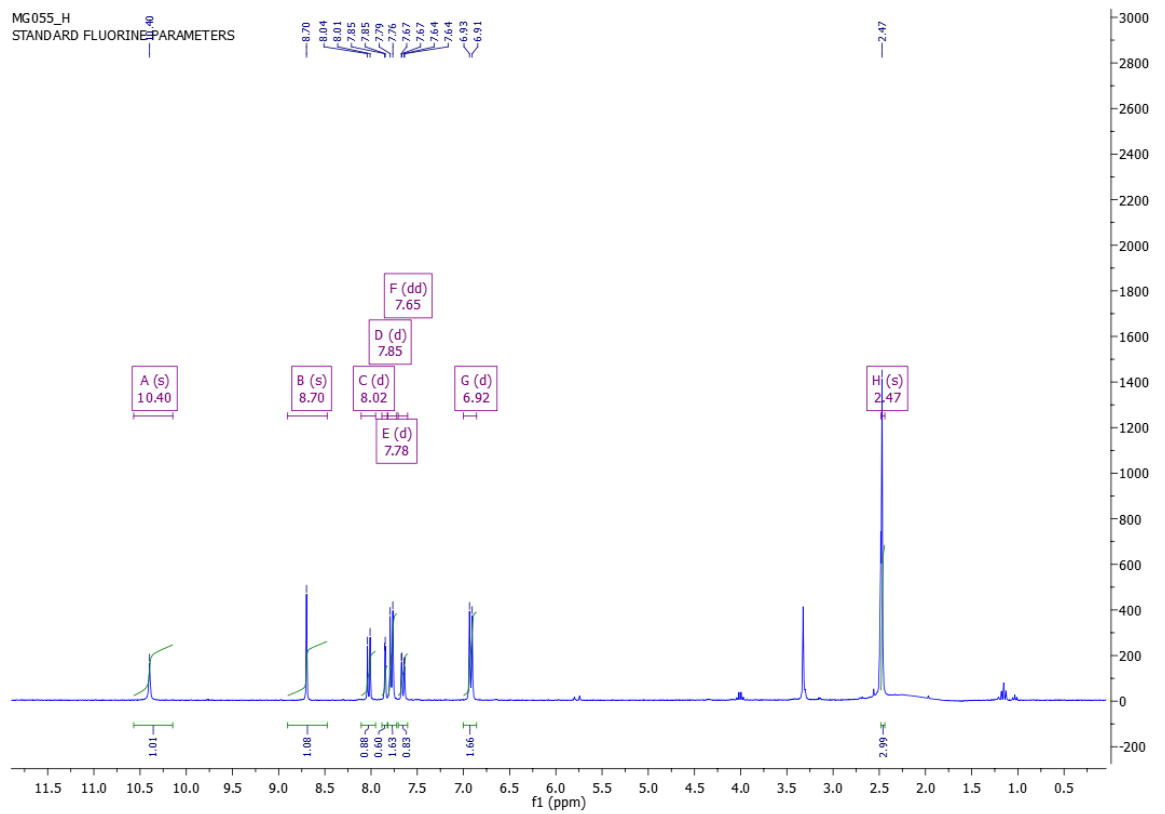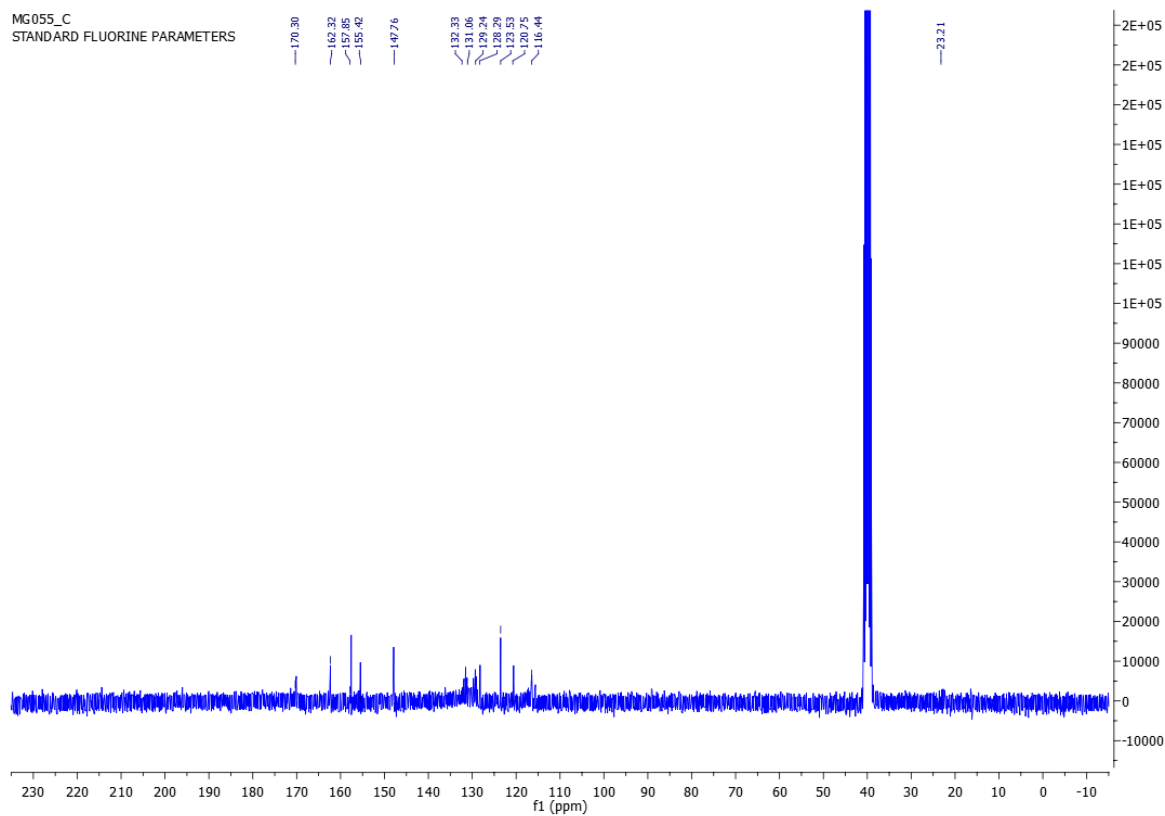



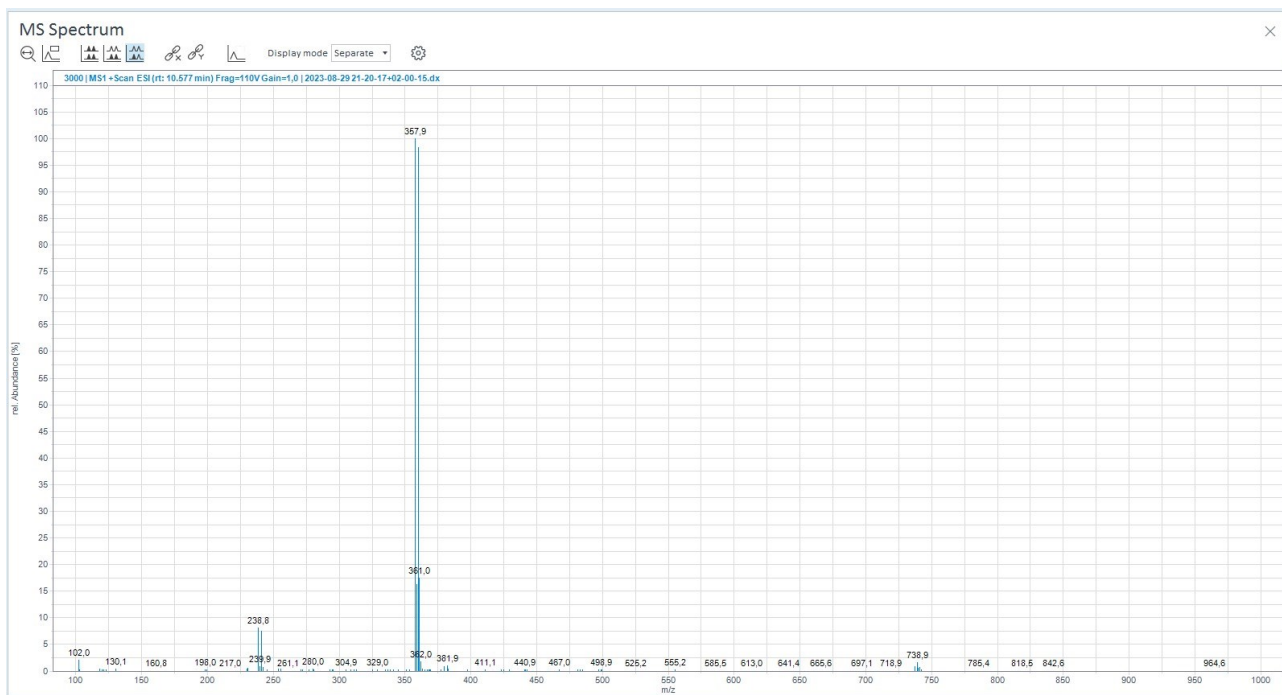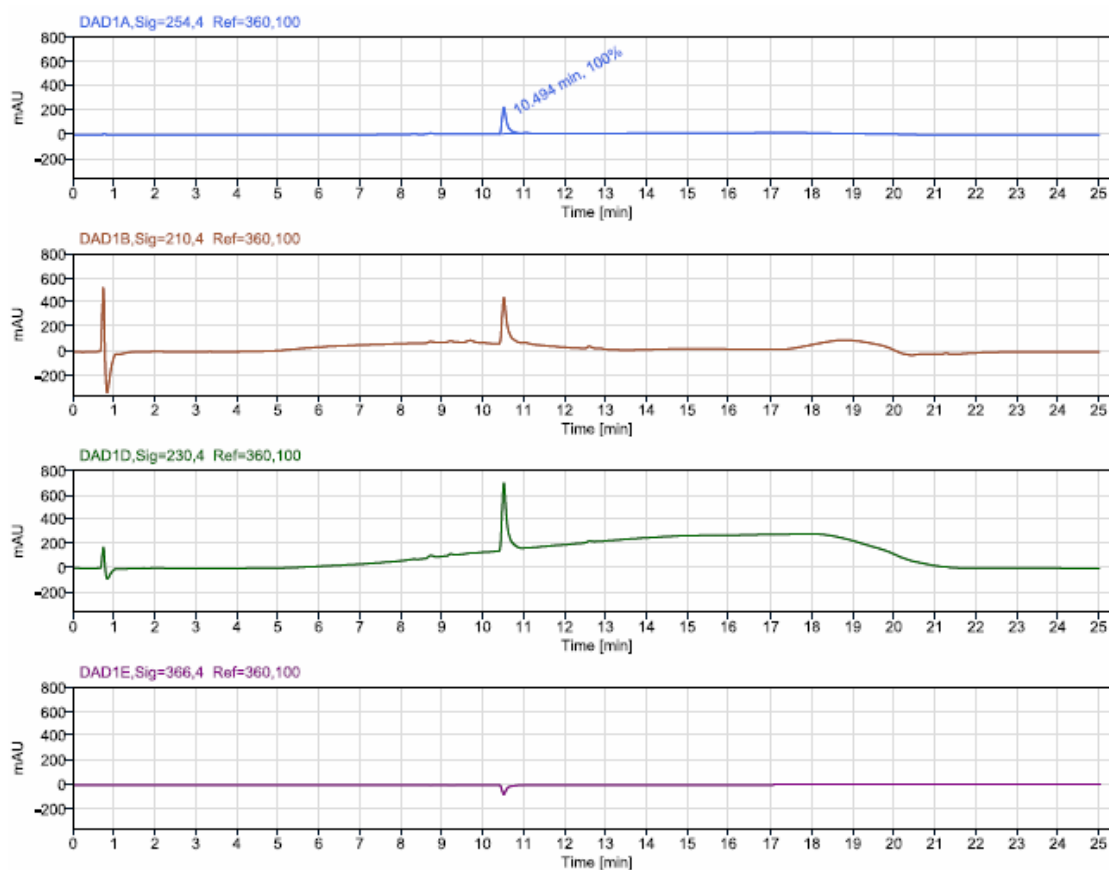

#### Peak Results (Area Percent at least 1%)

| RT (min) | Signal Description                   | Width (min) | Area      | Height   | Area%  |
|----------|--------------------------------------|-------------|-----------|----------|--------|
| 10.494   | DAD1A, Sig=254,4 Ref=360,100         | 0.599       | 1748.6    | 216.8    | 100.00 |
| 10.571   | MS1 +TIC SCAN ESI Frag=110V Gain=1.0 | 0.159       | 5198269.9 | 994096.1 | 100.00 |

**<sup>1</sup>H, <sup>13</sup>C NMR and HPLC/MS spectra of compound 8a**

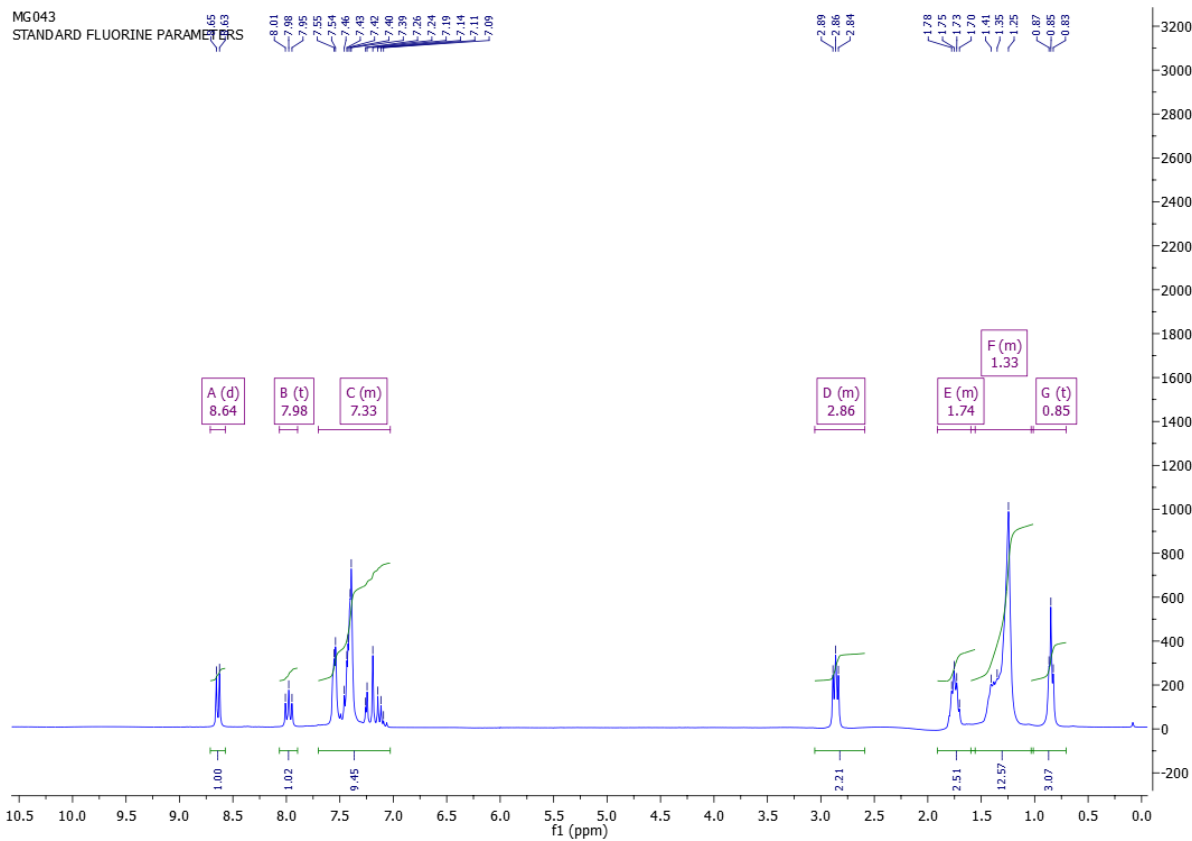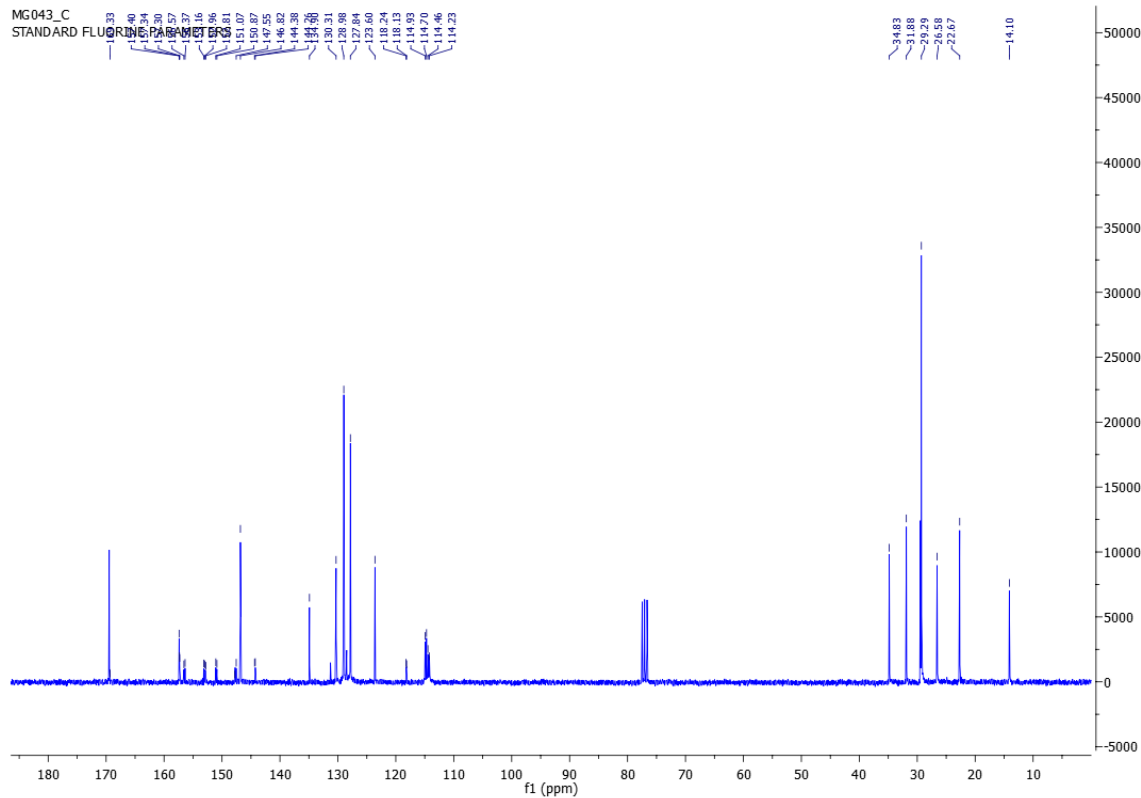

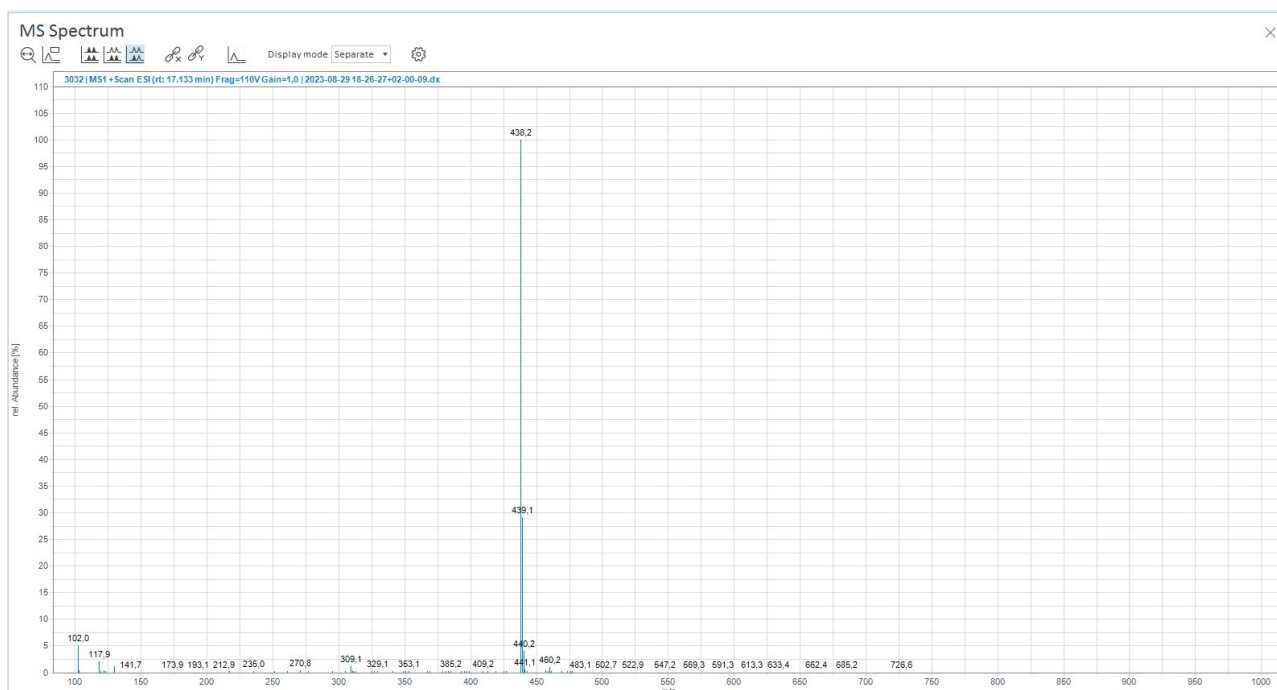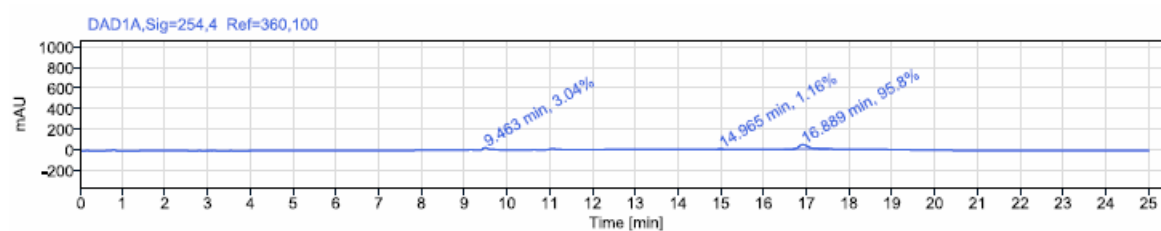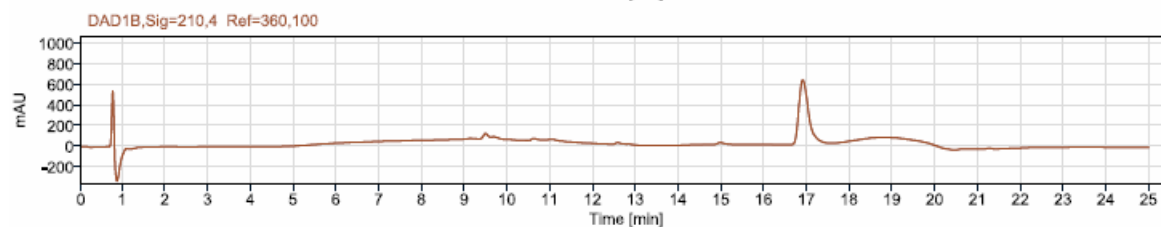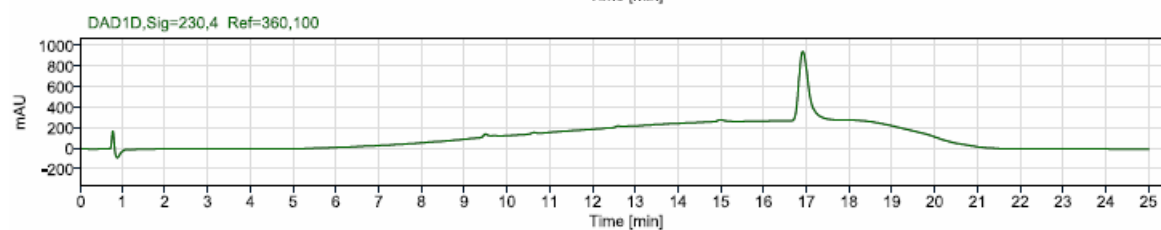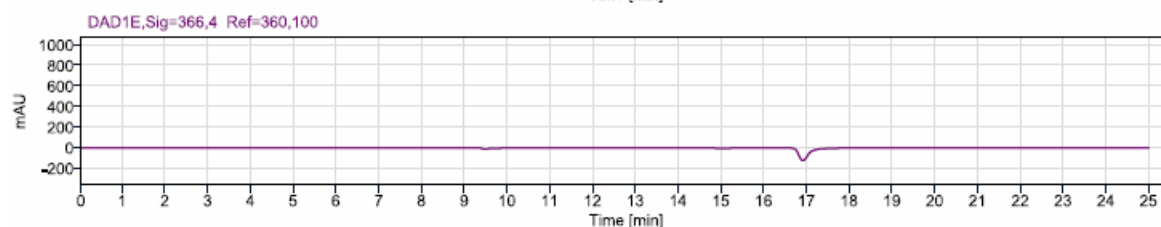

#### Peak Results (Area Percent at least 1%)

| RT (min) | Signal Description                    | Width (min) | Area      | Height   | Area%  |
|----------|---------------------------------------|-------------|-----------|----------|--------|
| 9.463    | DAD1A, Sig=254,4 Ref=360,100          | 0.088       | 21.4      | 7.0      | 3.04   |
| 14.965   | DAD1A, Sig=254,4 Ref=360,100          | 0.171       | 8.2       | 1.2      | 1.16   |
| 16.889   | DAD1A, Sig=254,4 Ref=360,100          | 1.046       | 674.7     | 43.3     | 95.80  |
| 17.135   | MS1 + TIC SCAN ESI Frag=110V Gain=1.0 | 0.563       | 7460209.7 | 319982.3 | 100.00 |

**<sup>1</sup>H, <sup>13</sup>C NMR and HPLC/MS spectra of compound 8b**

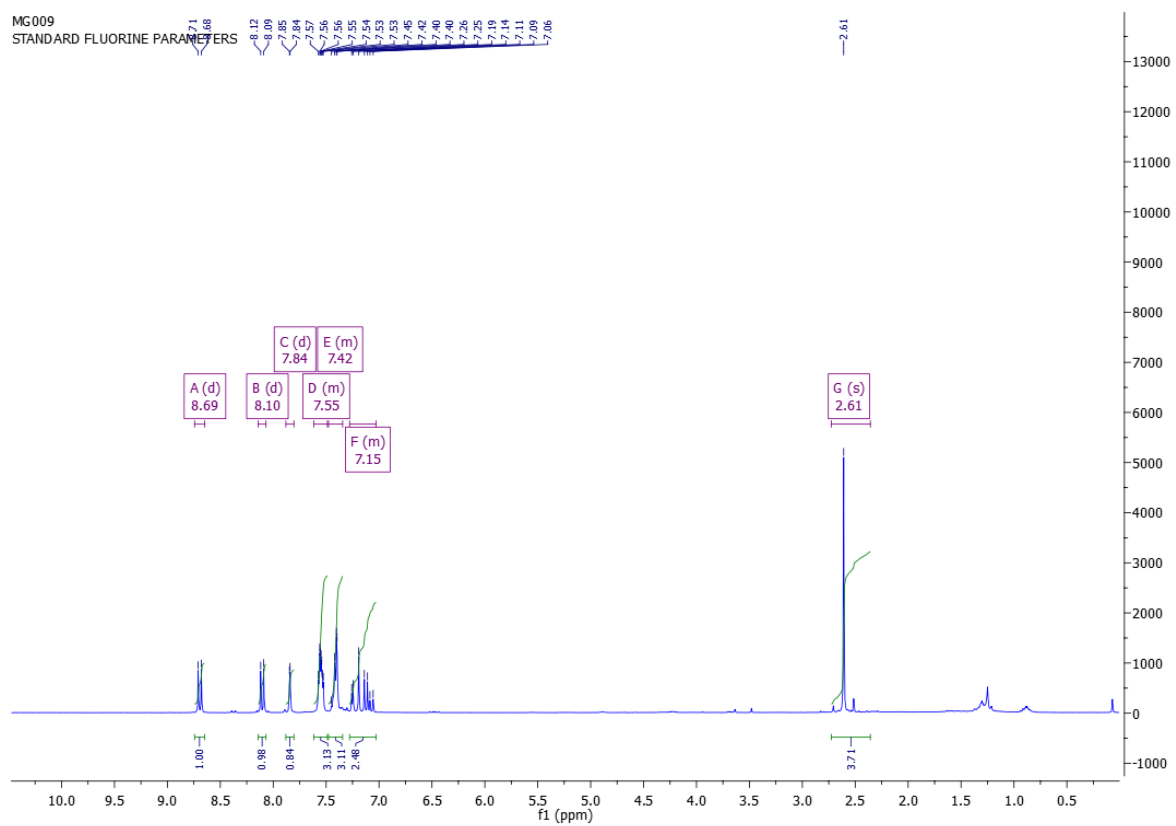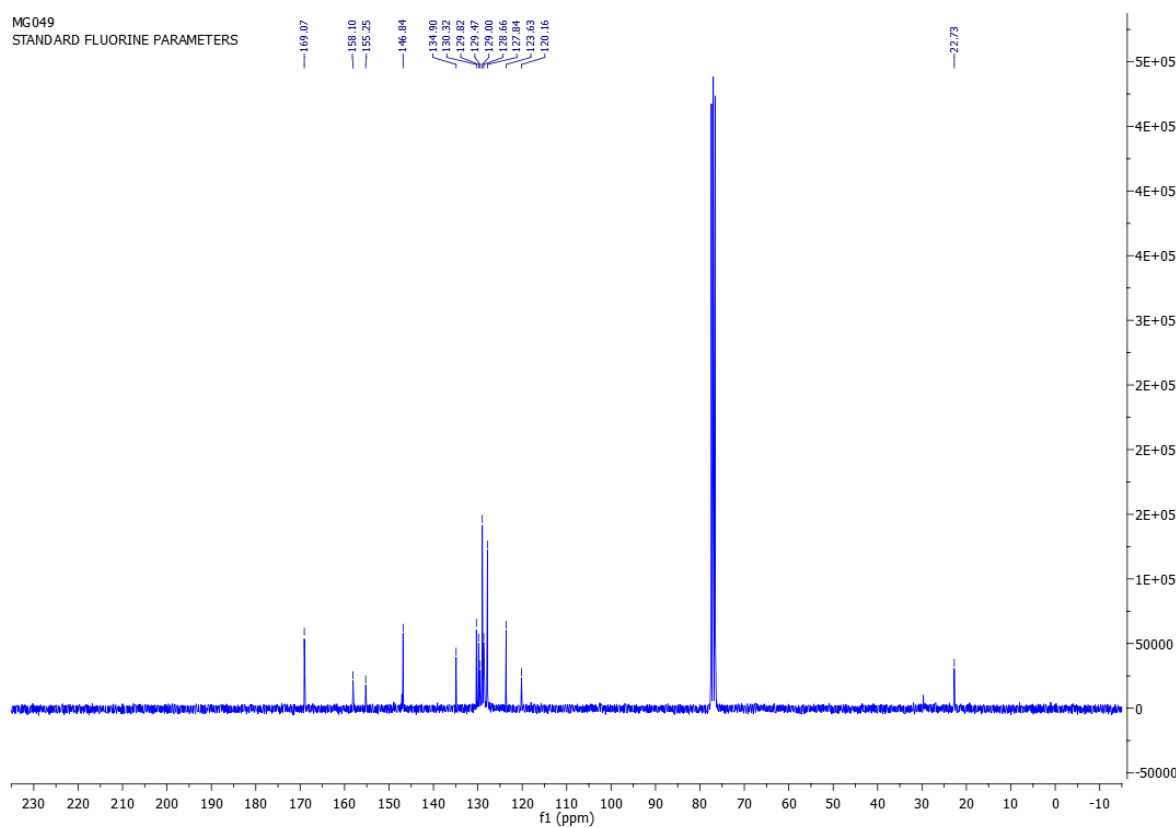

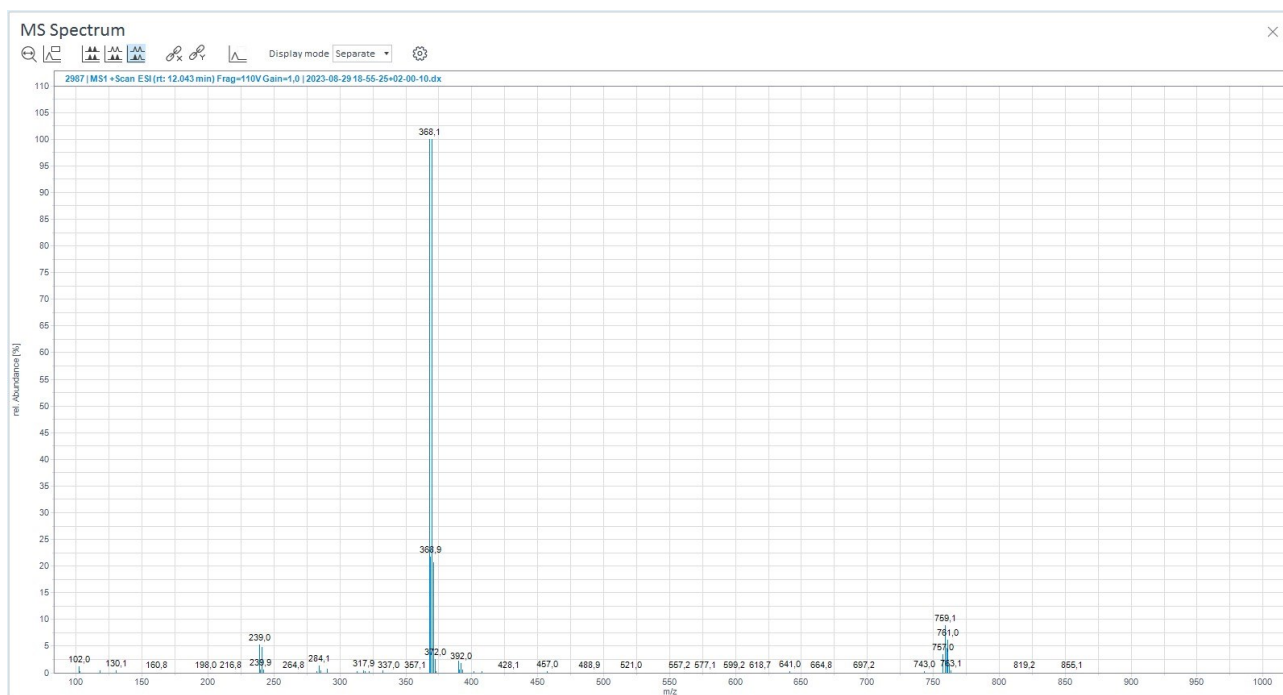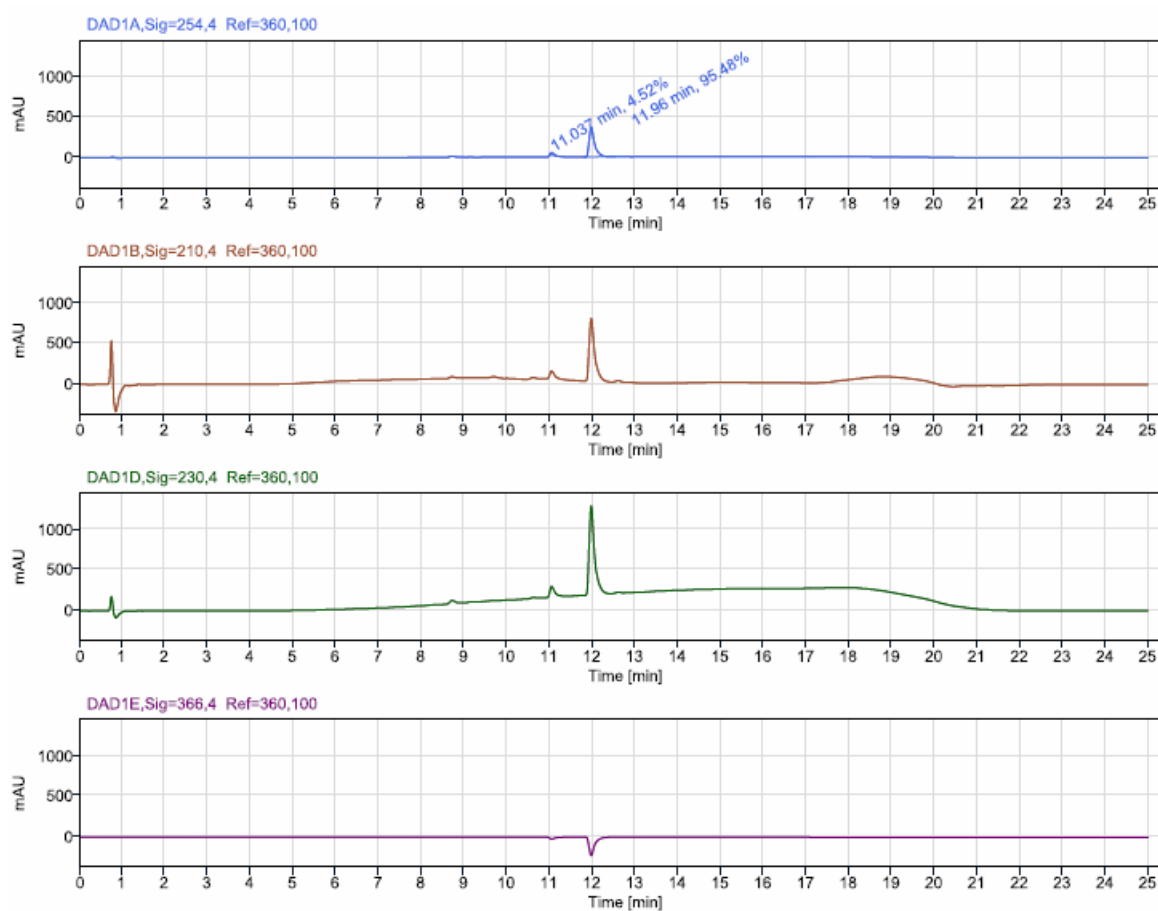

#### Peak Results (Area Percent at least 1%)

| RT (min) | Signal Description                   | Width (min) | Area       | Height    | Area%  |
|----------|--------------------------------------|-------------|------------|-----------|--------|
| 11.037   | DAD1A, Sig=254,4 Ref=360,100         | 0.158       | 153.6      | 31.0      | 4.52   |
| 11.960   | DAD1A, Sig=254,4 Ref=360,100         | 0.746       | 3241.3     | 364.8     | 95.48  |
| 12.040   | MS1 +TIC SCAN ESI Frag=110V Gain=1,0 | 0.698       | 25124082,9 | 1714932,0 | 100,00 |

MG082\_1H  
STANDARD FLUORINE PARAMETER

8.25  
8.22  
8.20  
8.15  
8.08  
7.69  
7.66  
7.64  
7.61  
7.58  
7.56  
7.46  
7.38  
7.34  
7.26  
7.24  
7.21  
5.22  
3.44

2.25  
9.95  
2.00

f1 (ppm)

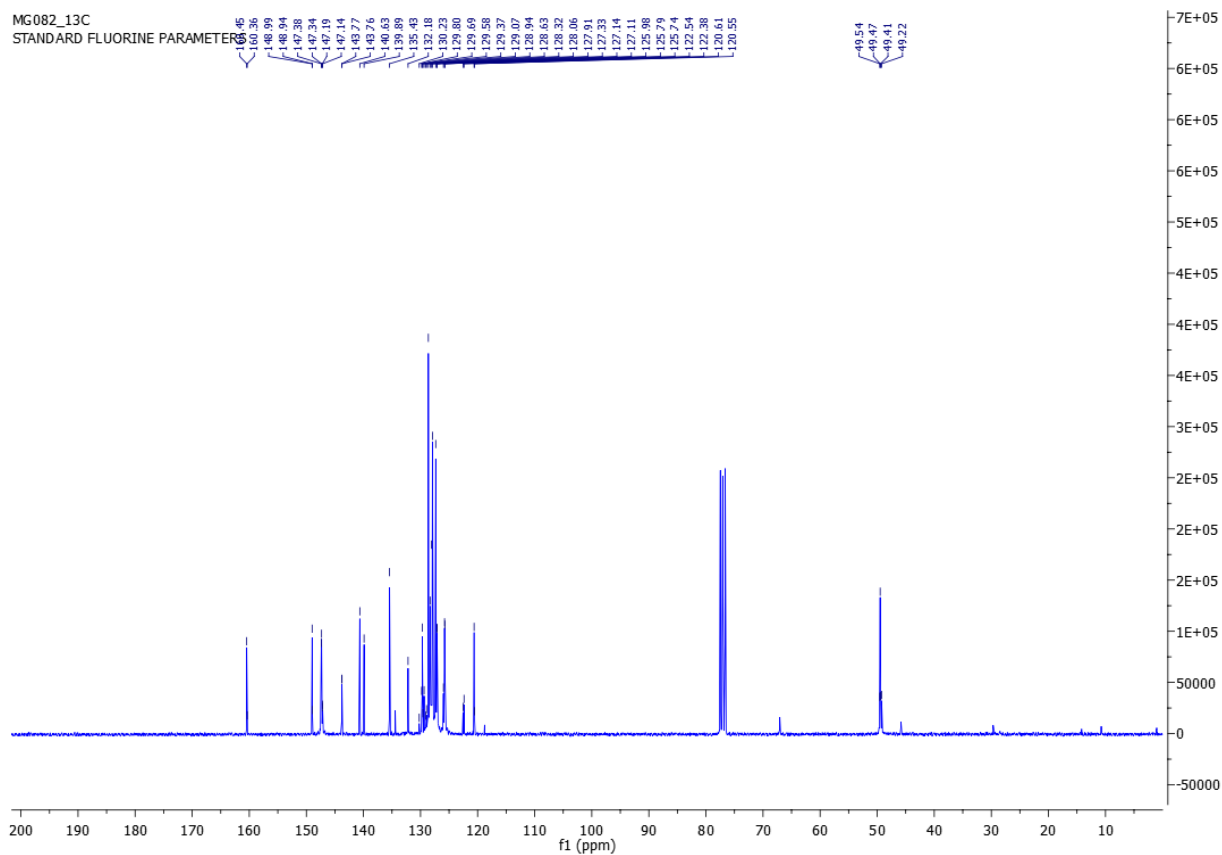

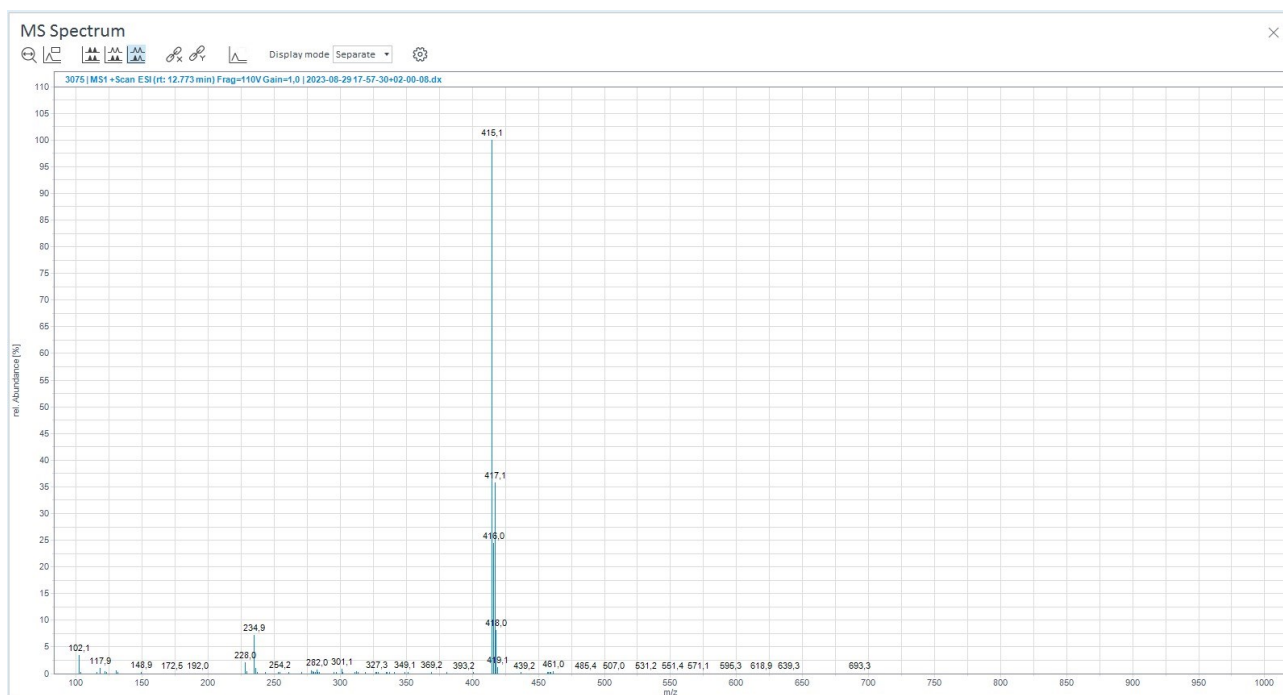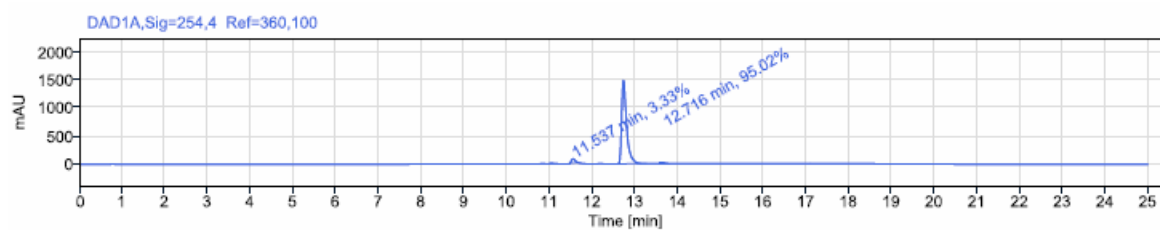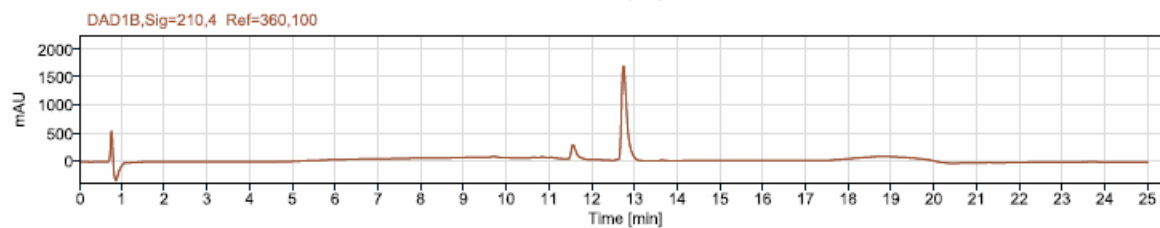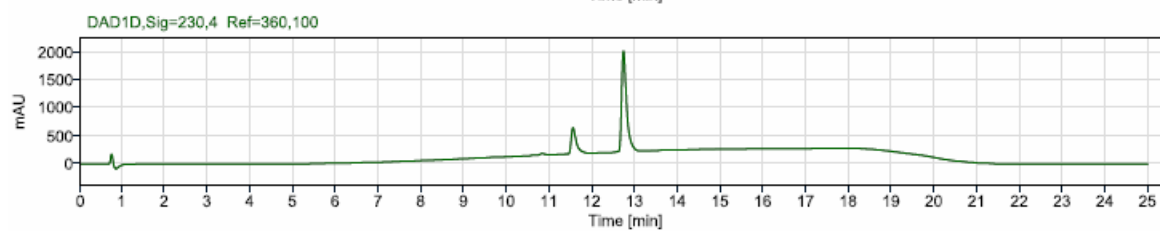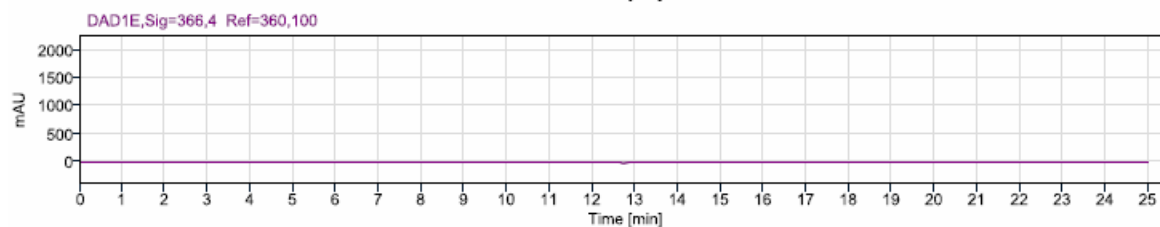

#### Peak Results (Area Percent at least 1%)

| RT (min) | Signal Description                   | Width (min) | Area      | Height   | Area%  |
|----------|--------------------------------------|-------------|-----------|----------|--------|
| 11.537   | DAD1A,Sig=254,4 Ref=360,100          | 0.187       | 421.6     | 71.6     | 3.33   |
| 12.716   | DAD1A,Sig=254,4 Ref=360,100          | 0.720       | 12036.0   | 1486.7   | 95.02  |
| 12.781   | MS1 +TIC SCAN ESI Frag=110V Gain=1,0 | 0,580       | 9926186,2 | 876734,5 | 100,00 |

**<sup>1</sup>H, <sup>13</sup>C NMR and HPLC/MS spectra of compound 10**

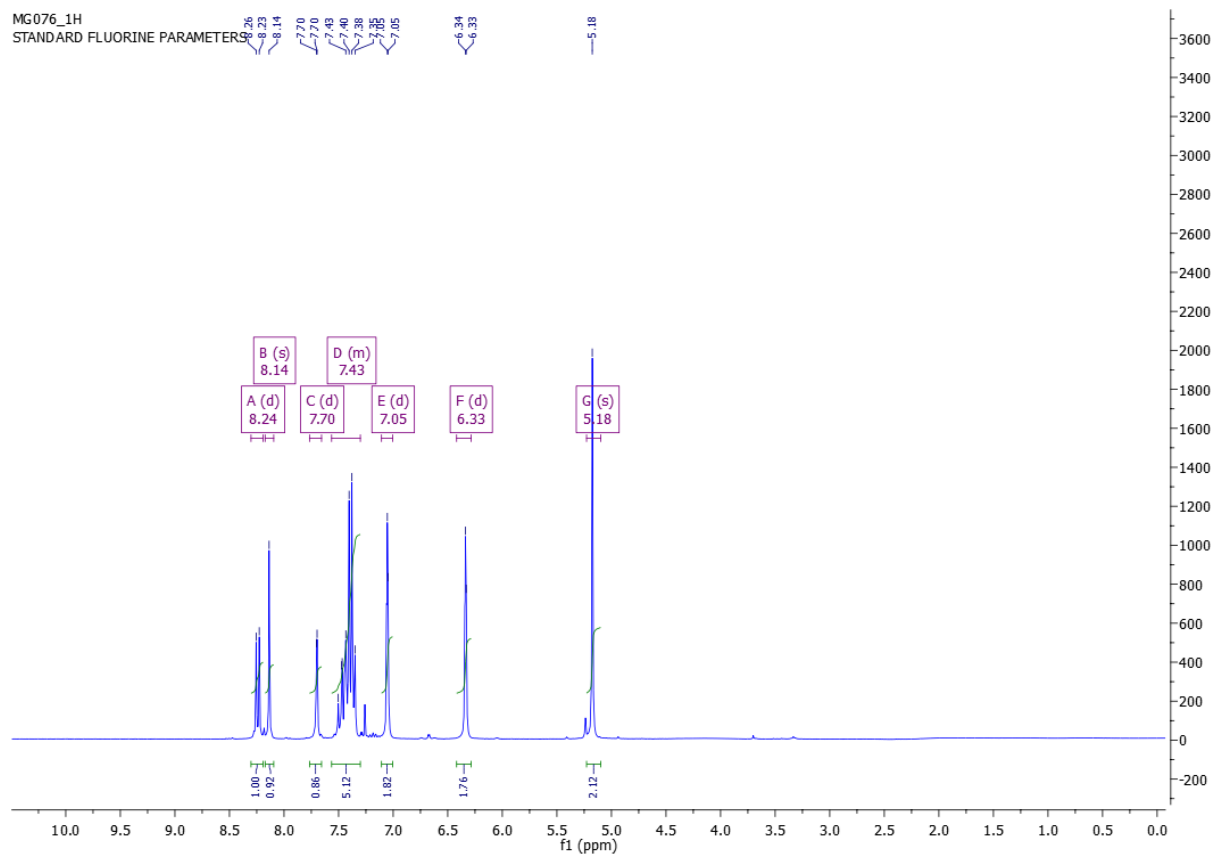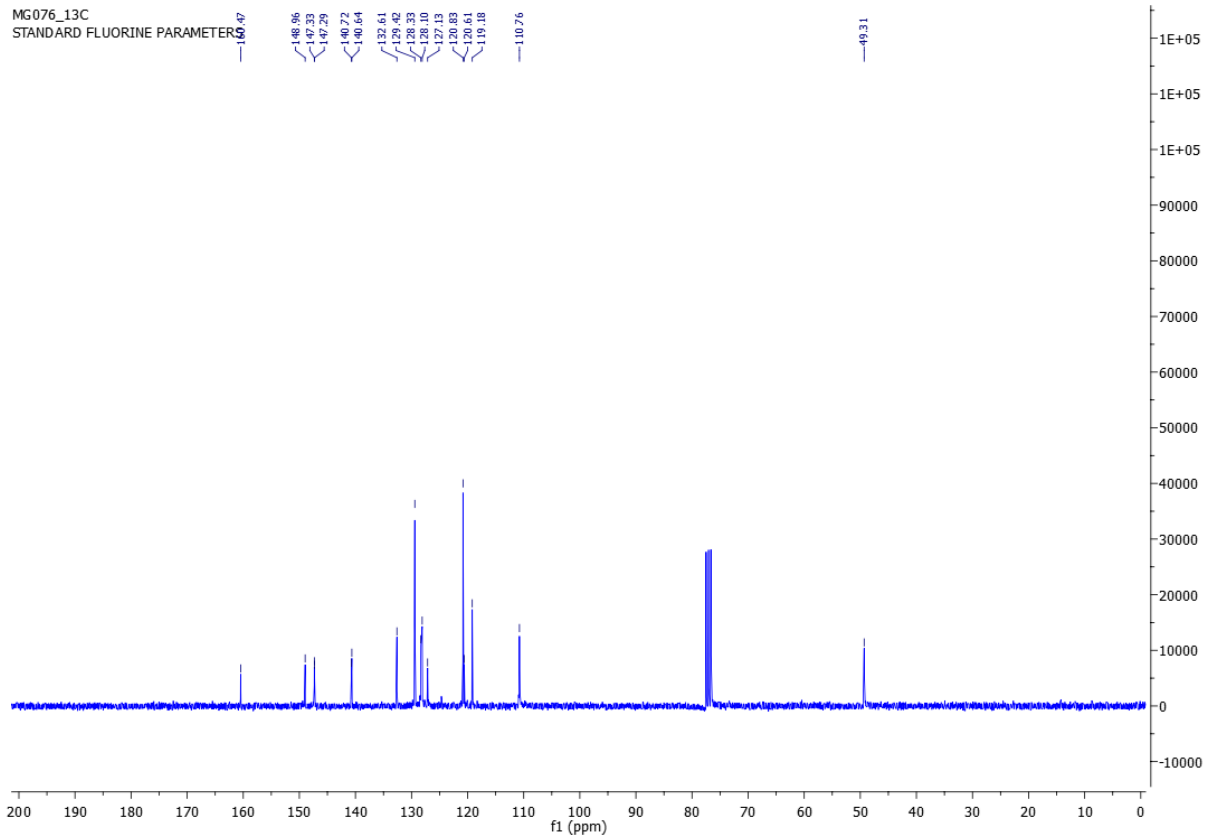



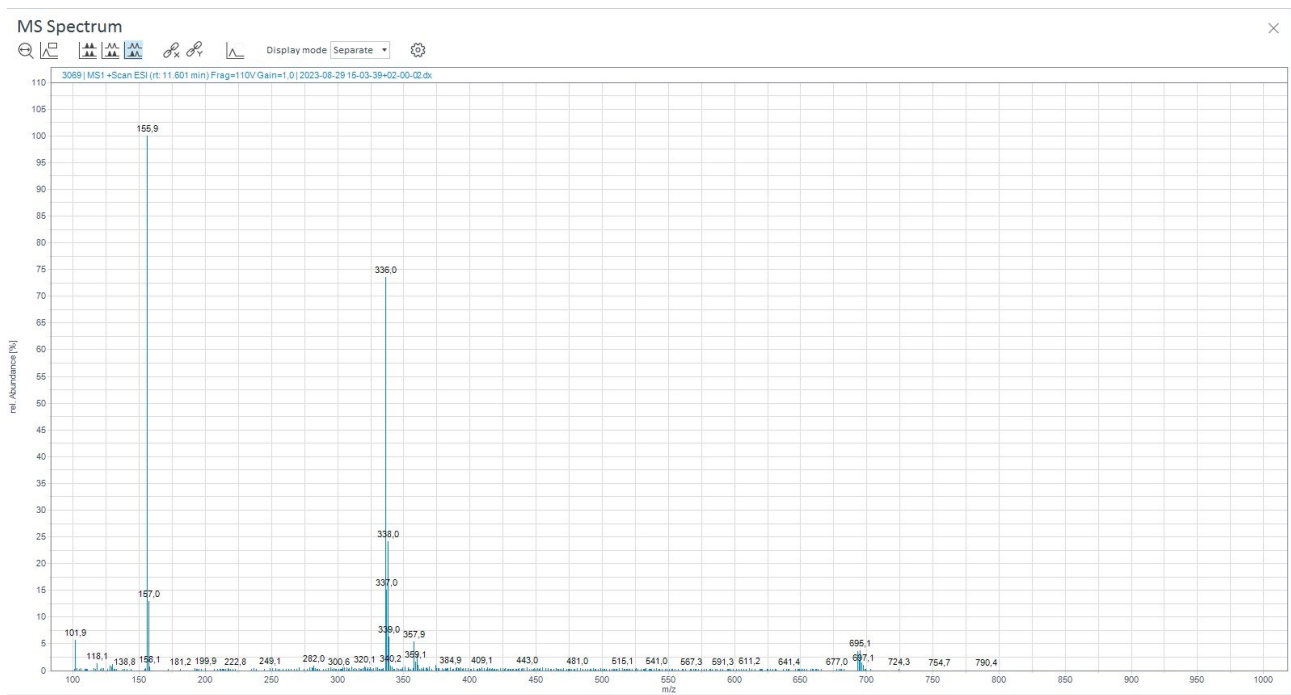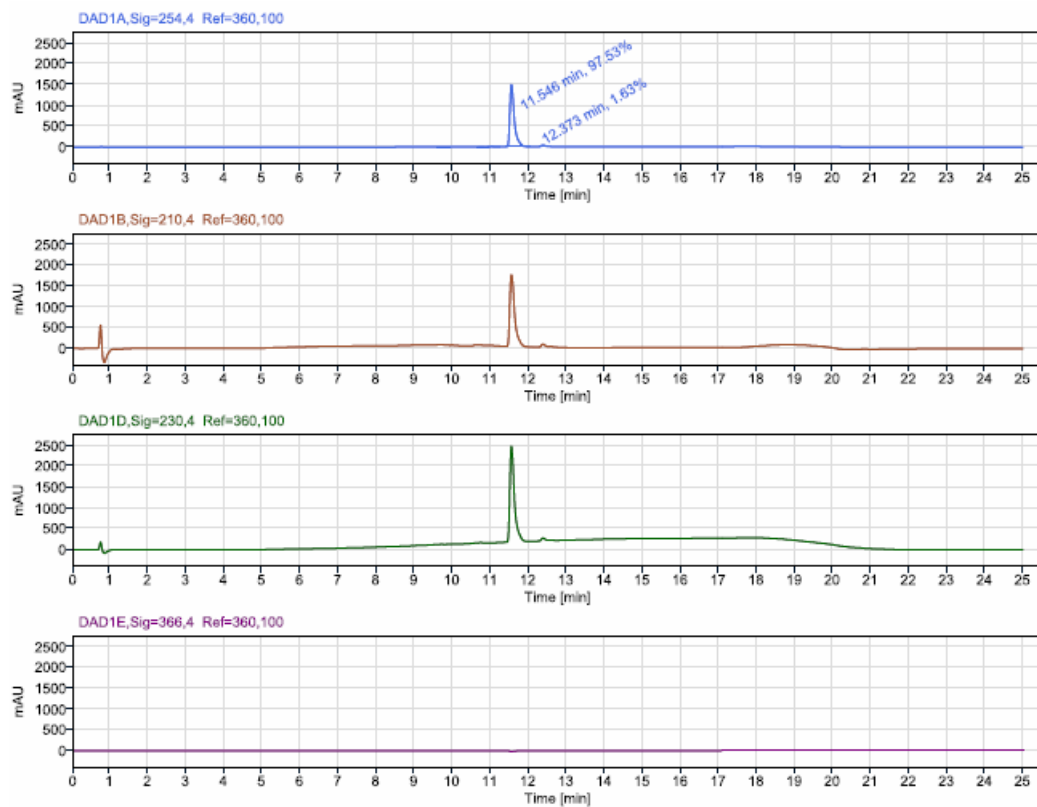

#### Peak Results (Area Percent at least 1%)

| RT (min) | Signal Description                   | Width (min) | Area      | Height   | Area%  |
|----------|--------------------------------------|-------------|-----------|----------|--------|
| 11.546   | DAD1A, Sig=254,4 Ref=360,100         | 0.600       | 12079.4   | 1498.3   | 97.53  |
| 11.598   | MS1 +TIC SCAN ESI Frag=110V Gain=1.0 | 0.309       | 4466372.3 | 433691.7 | 100.00 |
| 12.373   | DAD1A, Sig=254,4 Ref=360,100         | 0.198       | 202.4     | 32.6     | 1.63   |

# $^1\text{H}$ , $^{13}\text{C}$ NMR and HPLC/MS spectra of compound 11a

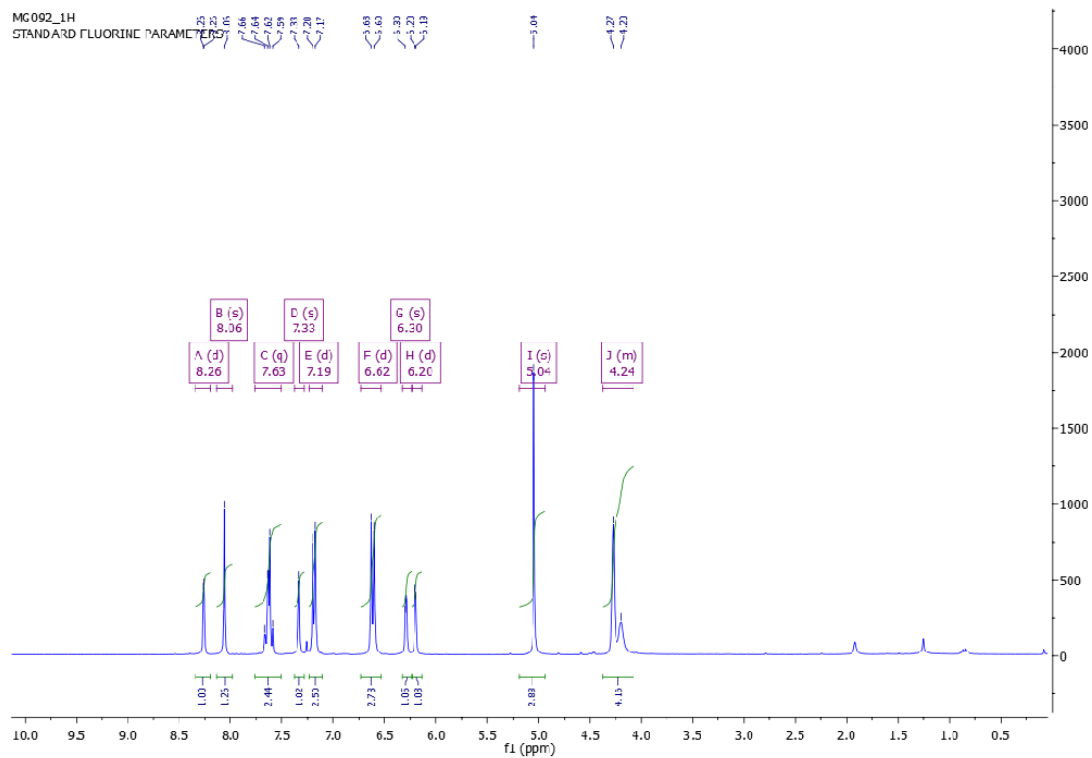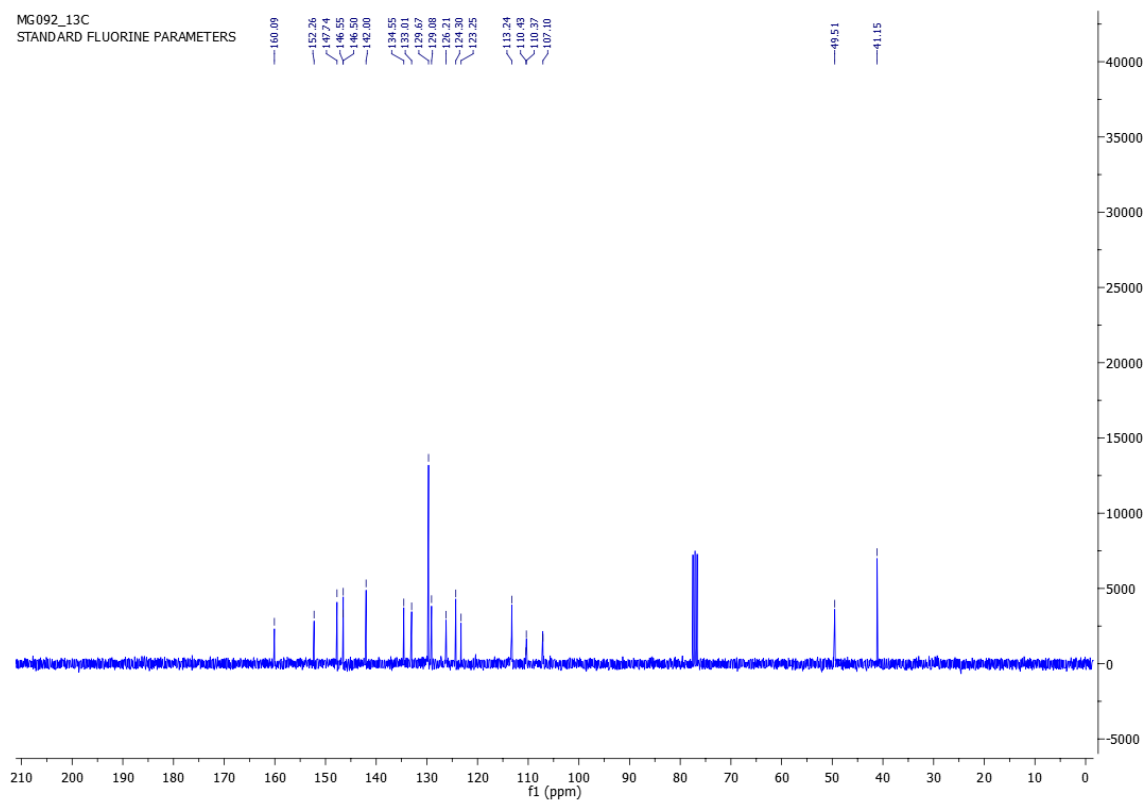

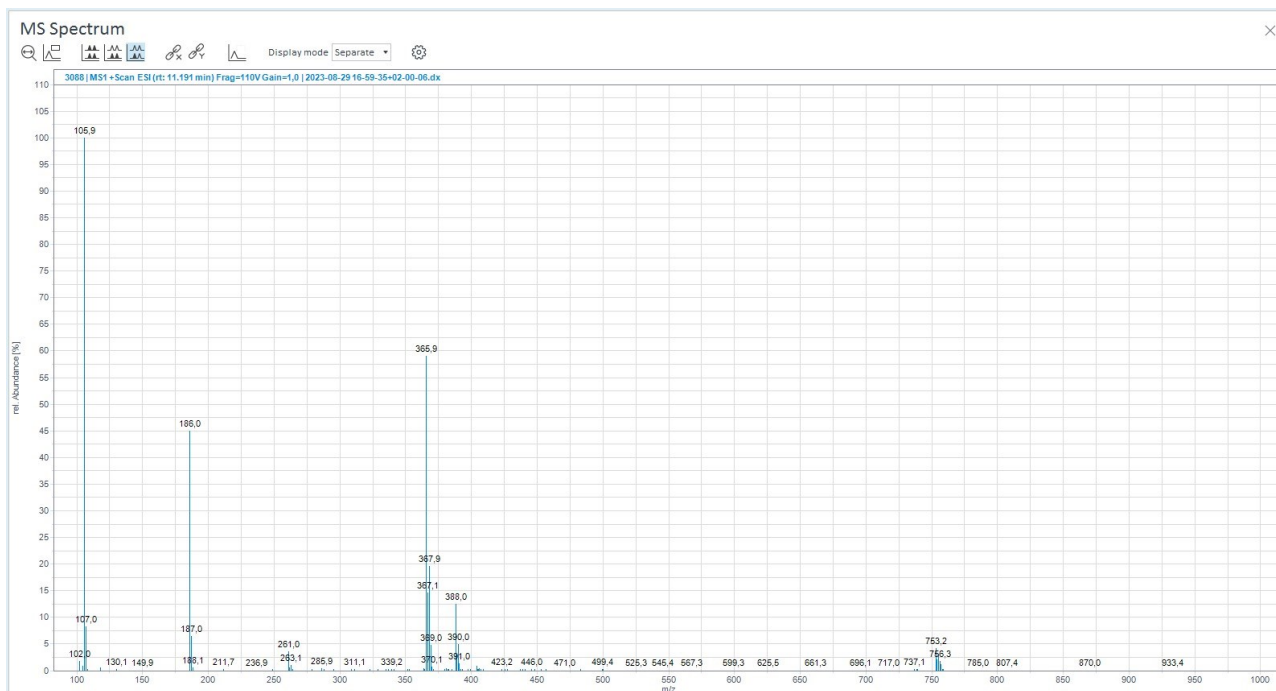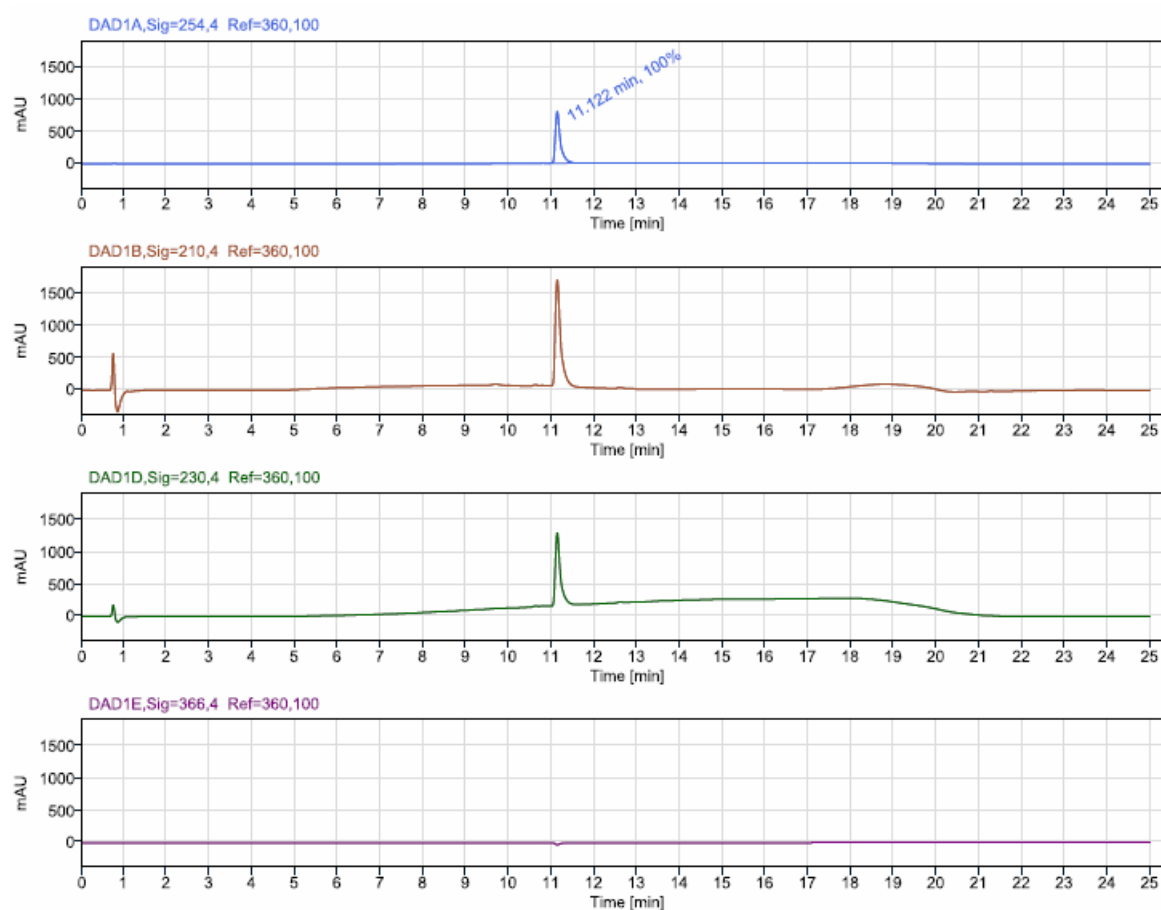

#### Peak Results (Area Percent at least 1%)

| RT (min) | Signal Description                   | Width (min) | Area       | Height    | Area%  |
|----------|--------------------------------------|-------------|------------|-----------|--------|
| 11.122   | DAD1A, Sig=254,4 Ref=360,100         | 0.744       | 6527.2     | 799.6     | 100.00 |
| 11.194   | MS1 +TIC SCAN ESI Frag=110V Gain=1.0 | 0.641       | 13906450.8 | 1242457.4 | 100.00 |

# $^1\text{H}$ , $^{13}\text{C}$ NMR and HPLC/MS spectra of compound 11b

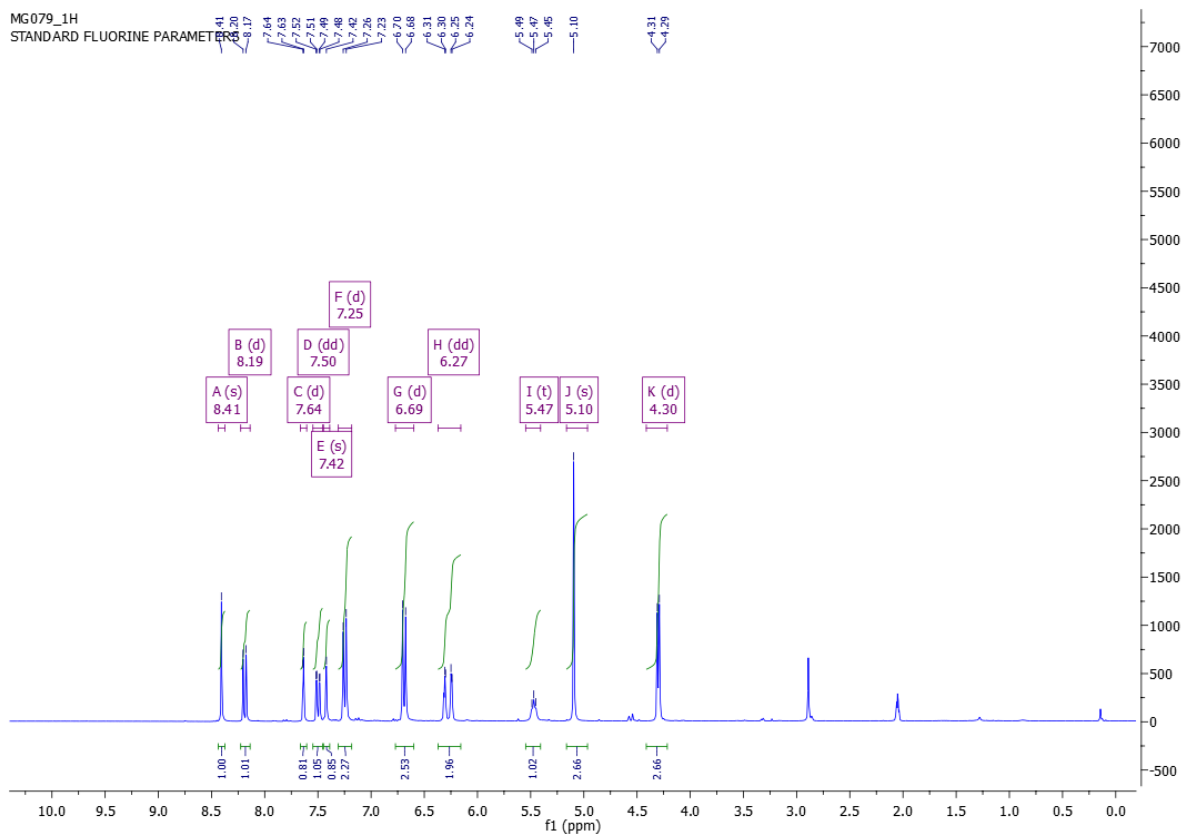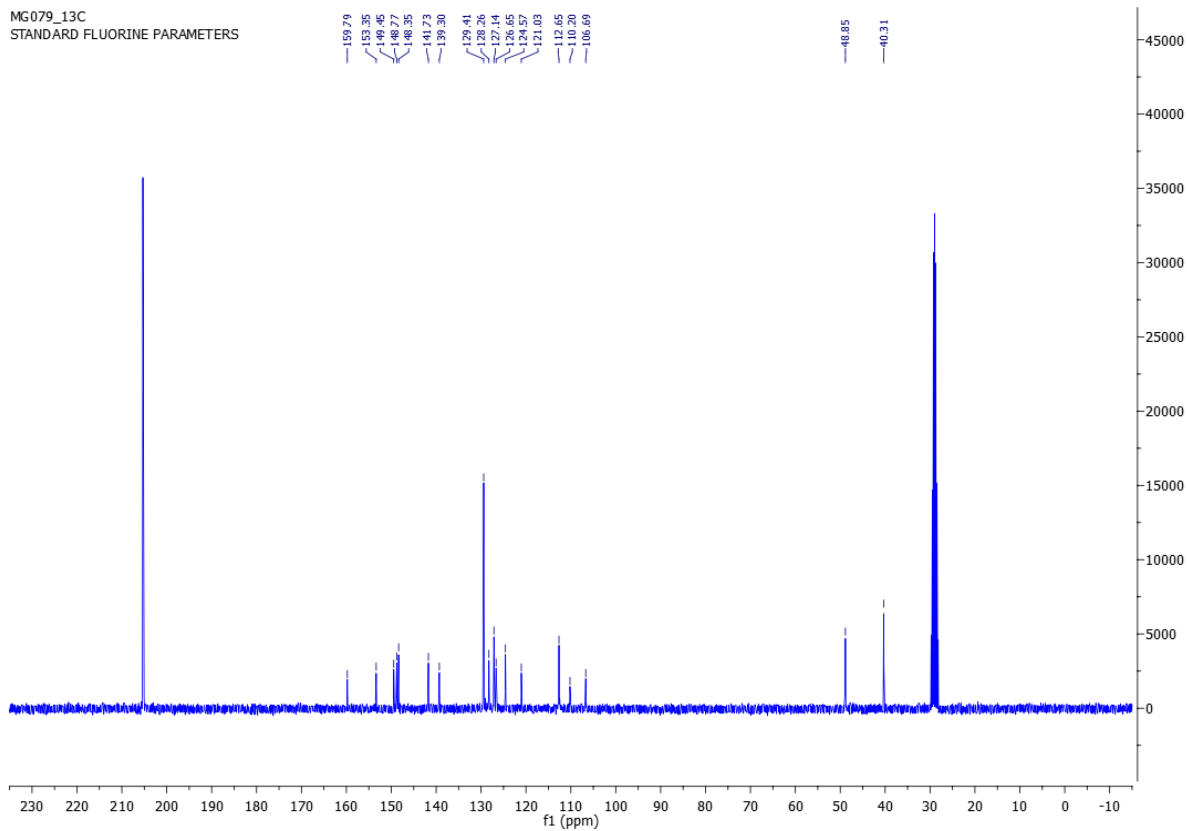

## MS Spectrum

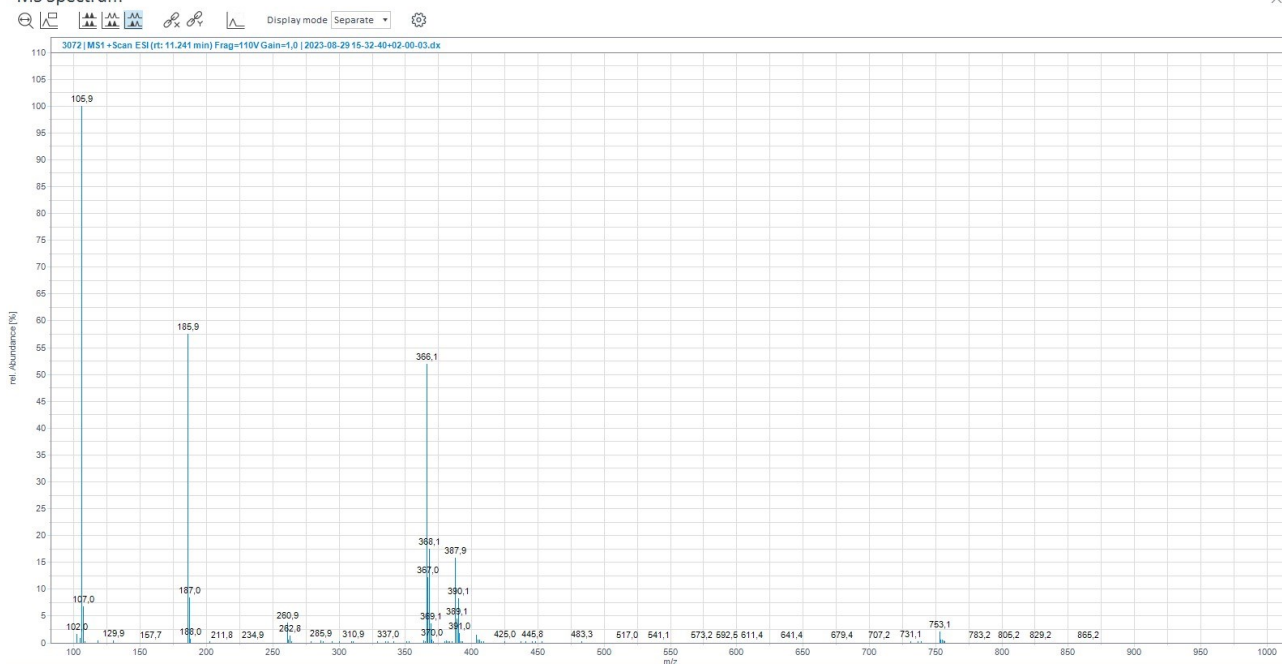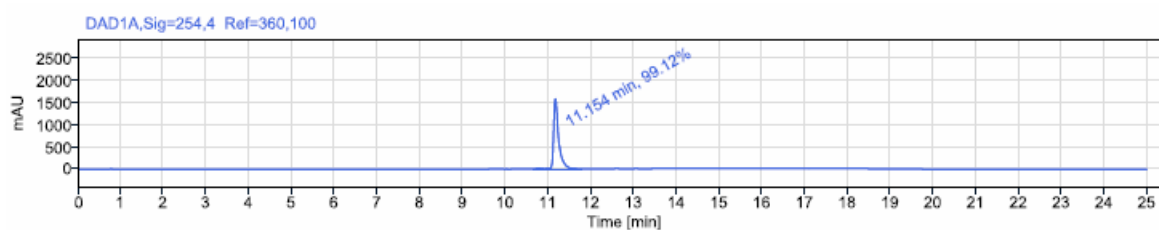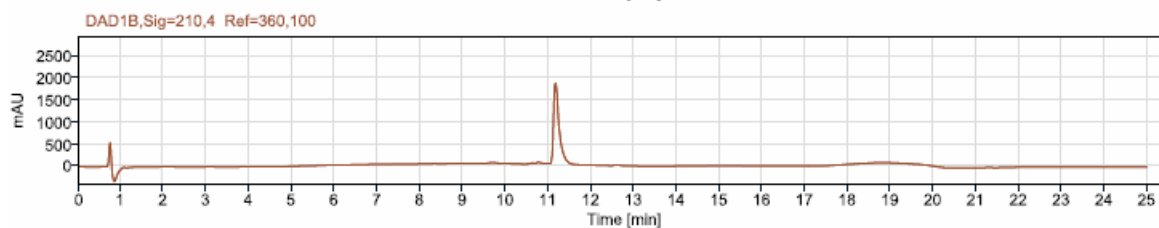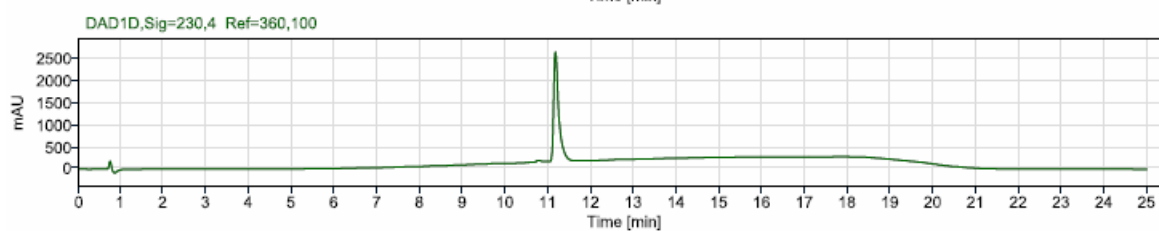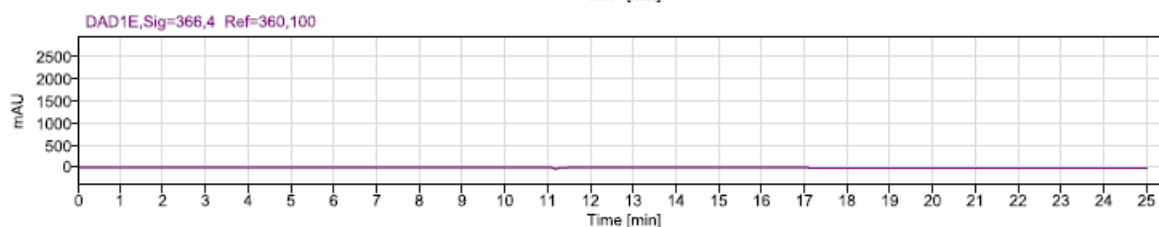

## Peak Results (Area Percent at least 1%)

| RT (min) | Signal Description                   | Width (min) | Area      | Height   | Area%  |
|----------|--------------------------------------|-------------|-----------|----------|--------|
| 11.154   | DAD1A, Sig=254,4 Ref=360,100         | 0.862       | 12972.6   | 1597.1   | 99.12  |
| 11.237   | MS1 +TIC SCAN ESI Frag=110V Gain=1.0 | 0.245       | 7000609.1 | 954160.4 | 100.00 |

**<sup>1</sup>H, <sup>13</sup>C NMR and HPLC/MS spectra of compound 11c**

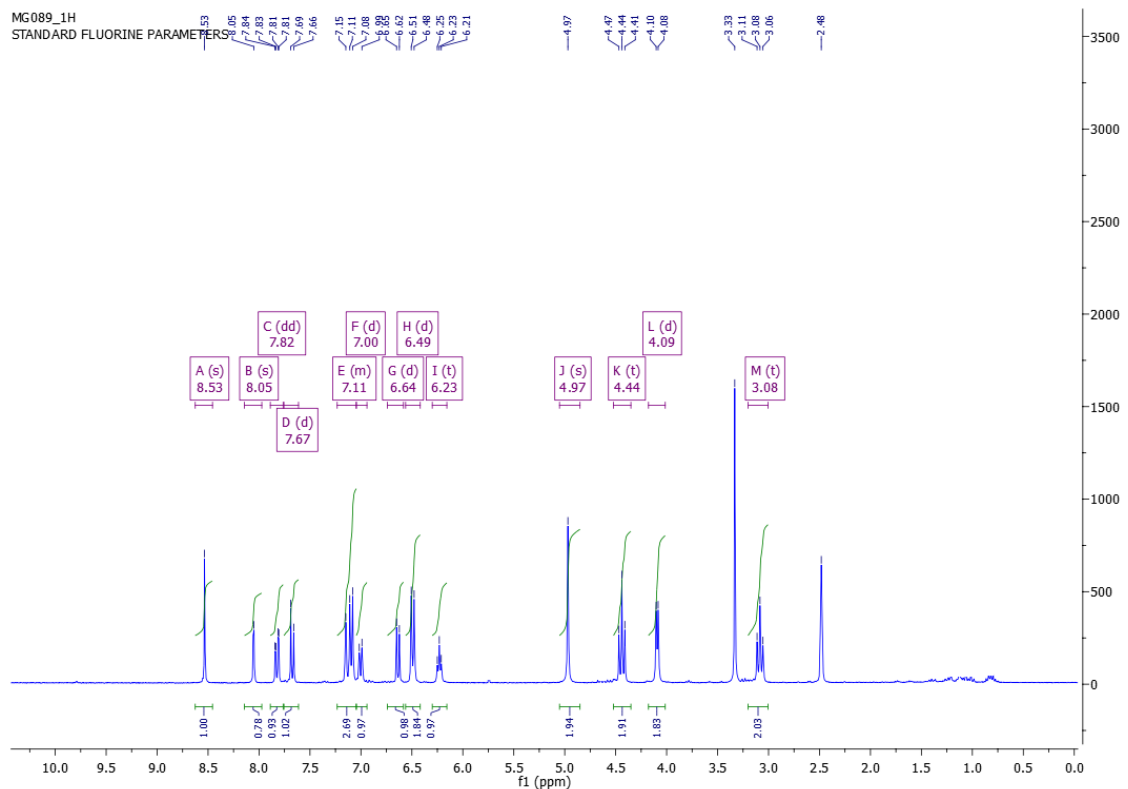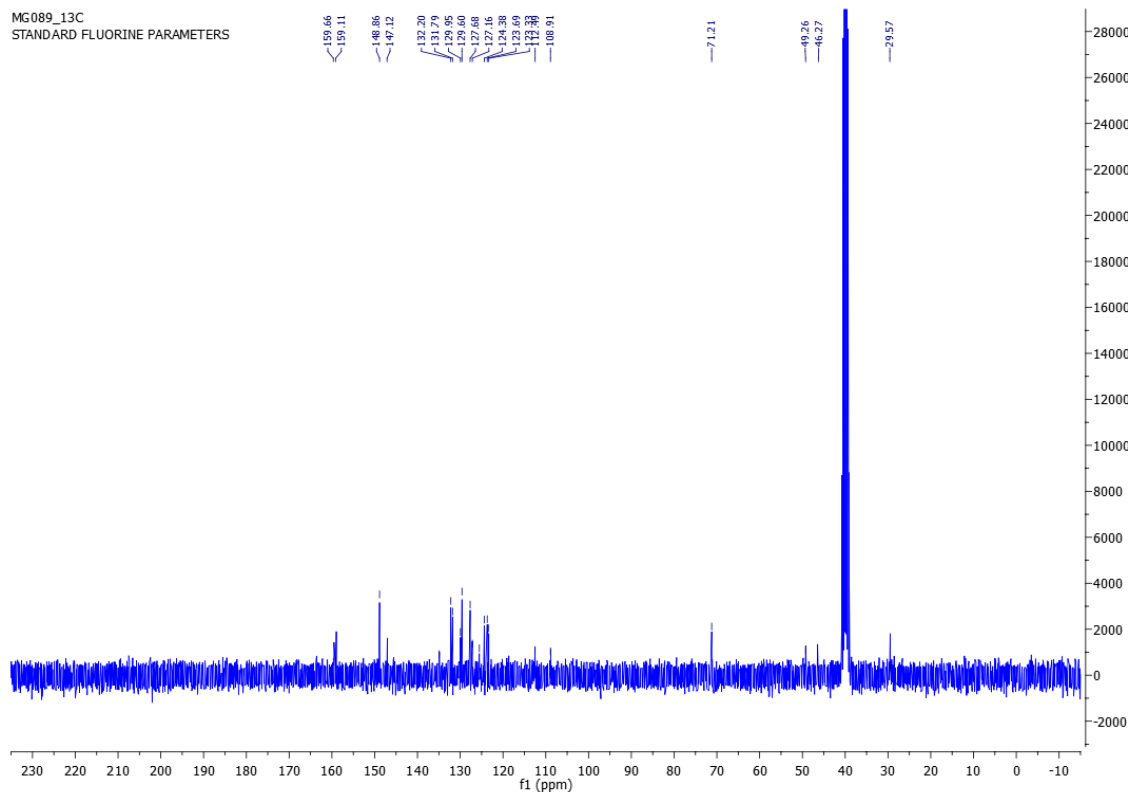

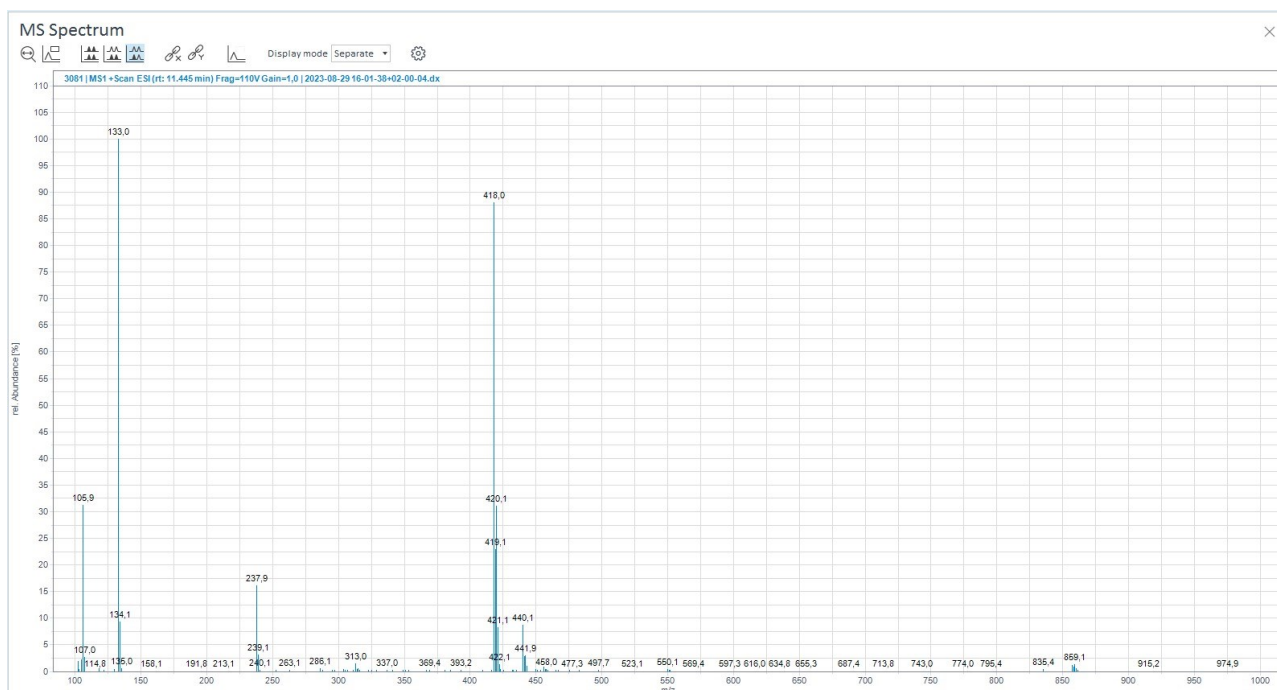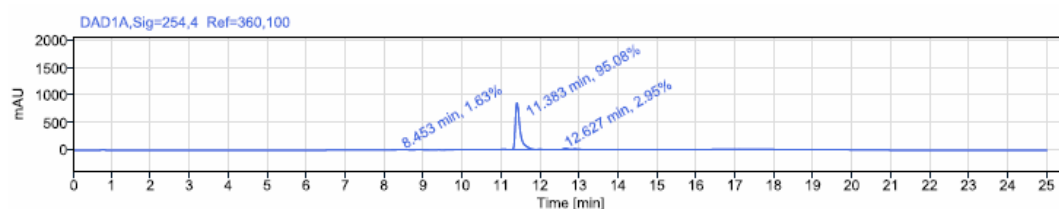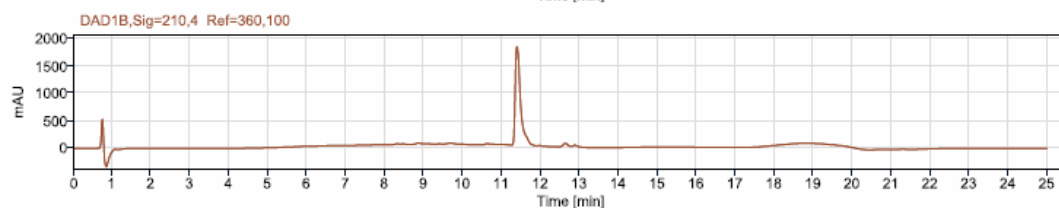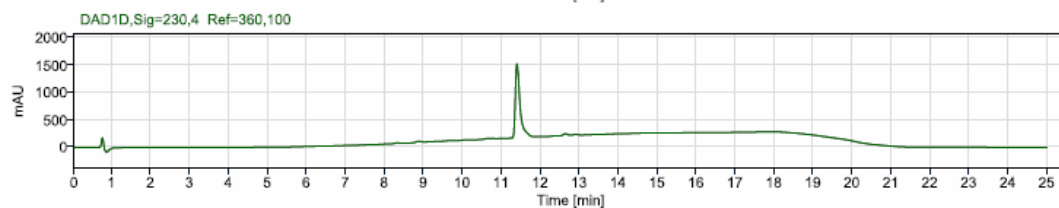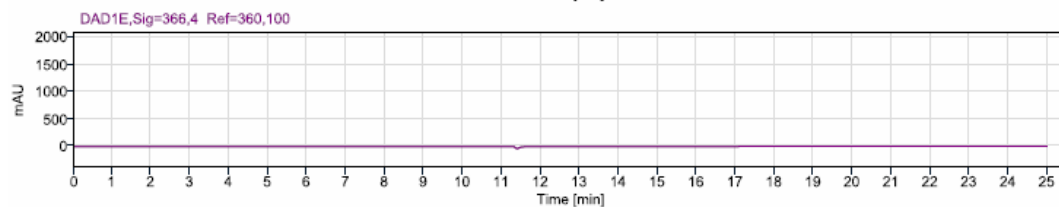

#### Peak Results (Area Percent at least 1%)

| RT (min) | Signal Description                   | Width (min) | Area       | Height    | Area%  |
|----------|--------------------------------------|-------------|------------|-----------|--------|
| 8.453    | DAD1A,Sig=254,4 Ref=360,100          | 0.937       | 122.9      | 6.7       | 1.63   |
| 11.383   | DAD1A,Sig=254,4 Ref=360,100          | 0.829       | 7149.8     | 855.5     | 95.08  |
| 11.450   | MS1 +TIC SCAN ESI Frag=110V Gain=1.0 | 0.666       | 18189544.3 | 1504397.8 | 100.00 |
| 12.627   | DAD1A,Sig=254,4 Ref=360,100          | 0.757       | 221.9      | 18.7      | 2.95   |

<sup>1</sup>H, <sup>13</sup>C NMR and HPLC/MS spectra of compound 11d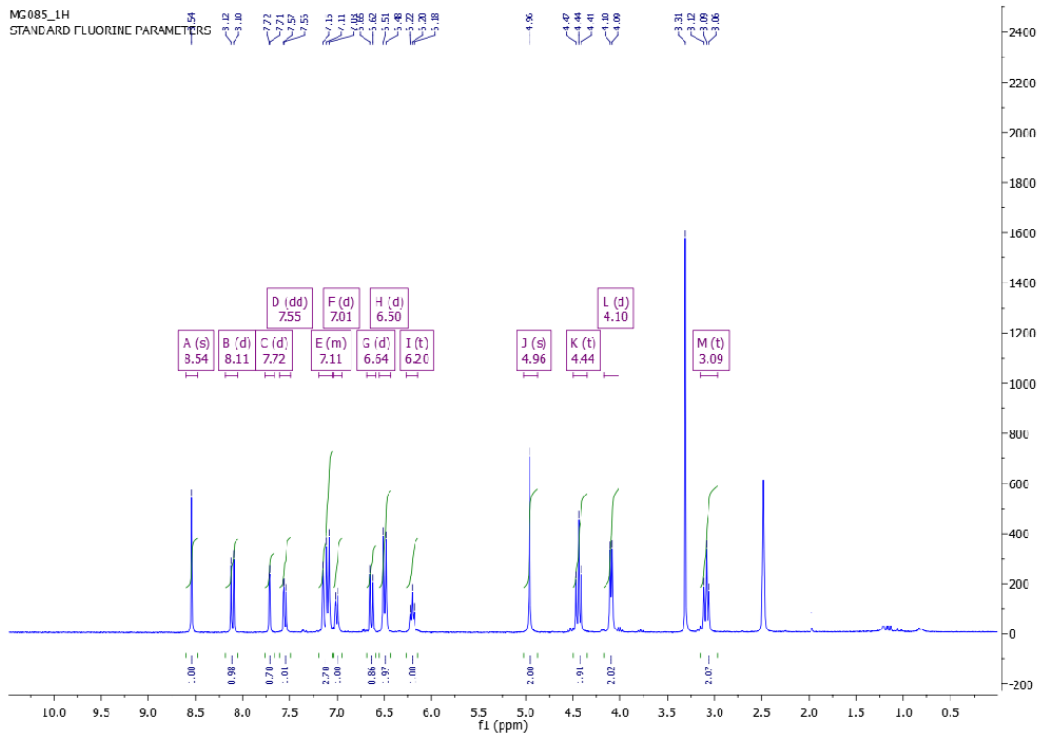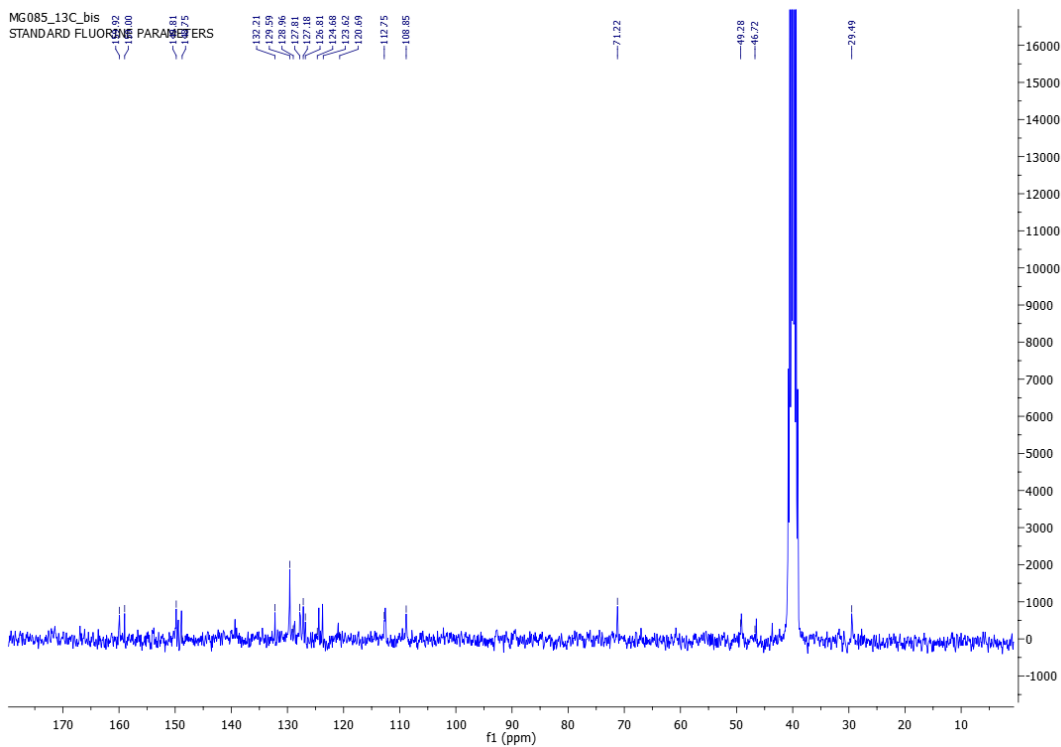



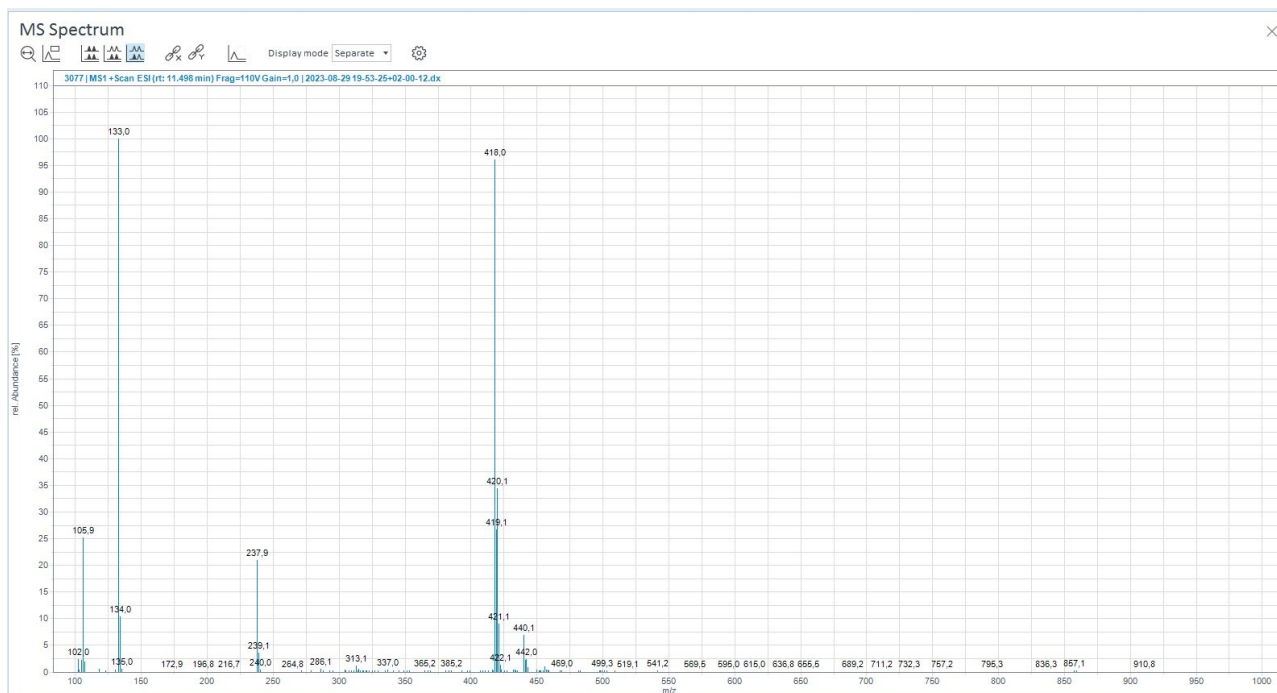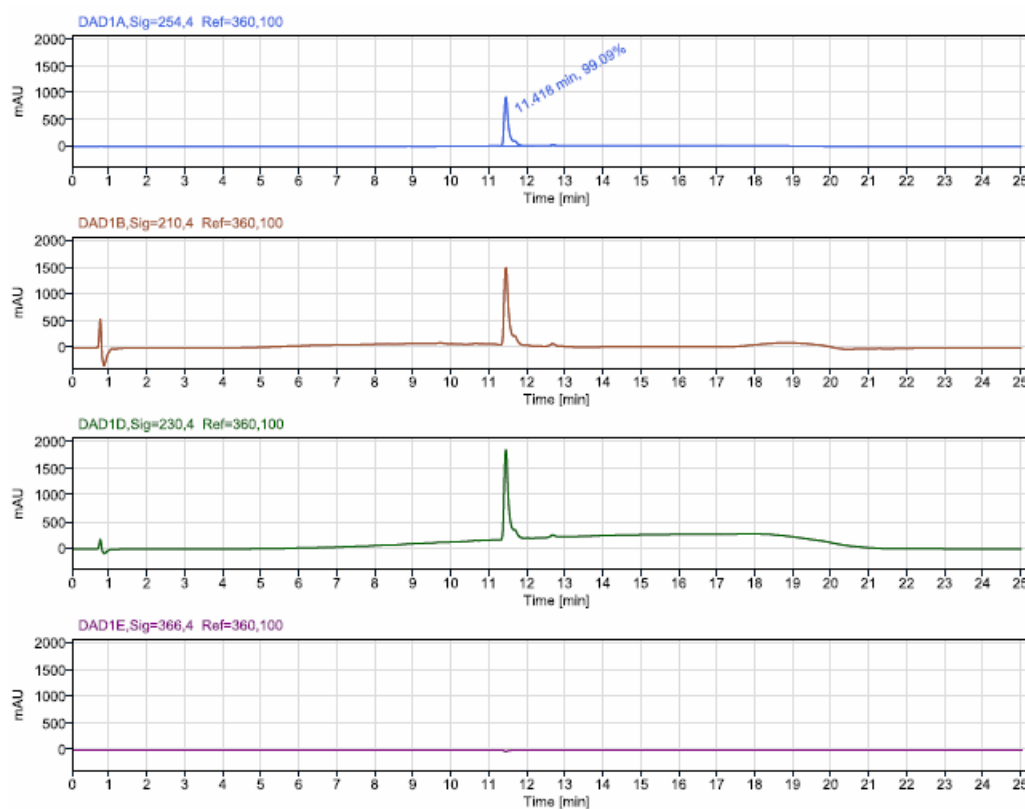

#### Peak Results (Area Percent at least 1%)

| RT (min) | Signal Description                    | Width (min) | Area       | Height    | Area%  |
|----------|---------------------------------------|-------------|------------|-----------|--------|
| 11.418   | DAD1A, Sig=254,4 Ref=360,100          | 0.916       | 7954.0     | 921.1     | 99.09  |
| 11.494   | MS1 + TIC SCAN ESI Frag=110V Gain=1.0 | 0.334       | 14399325.7 | 1429202.5 | 100.00 |

**$^1\text{H}$ ,  $^{13}\text{C}$  NMR and HPLC/MS spectra of compound 11e**

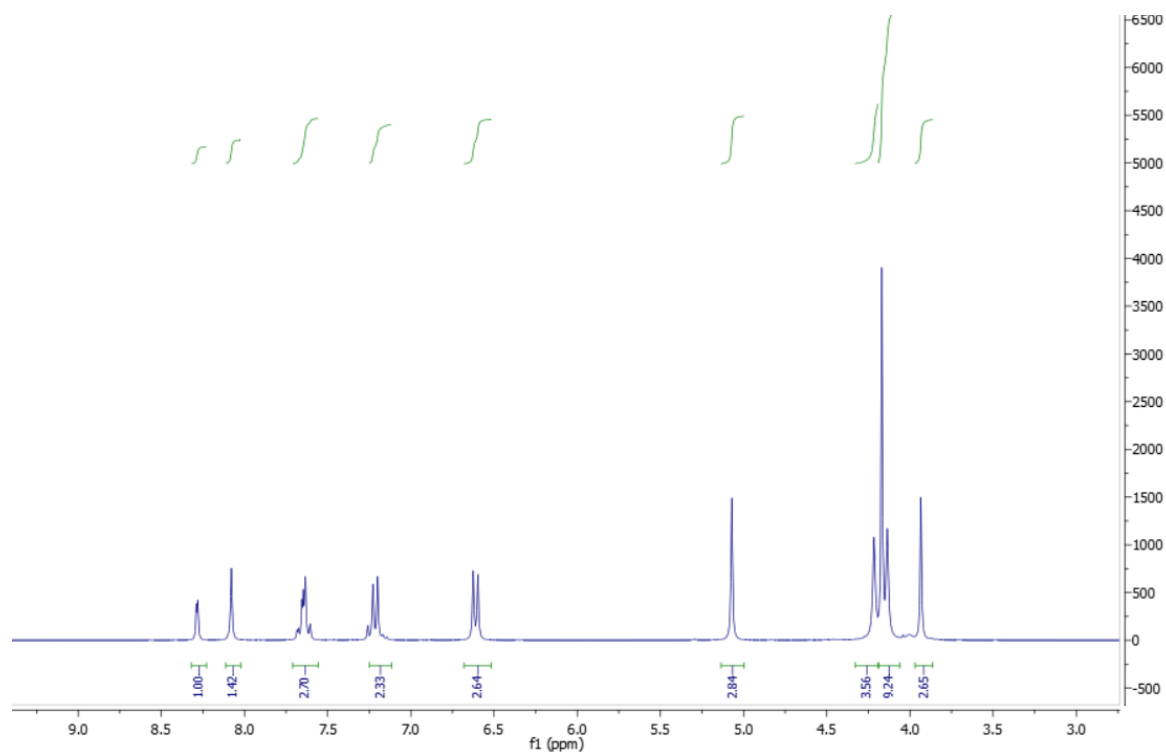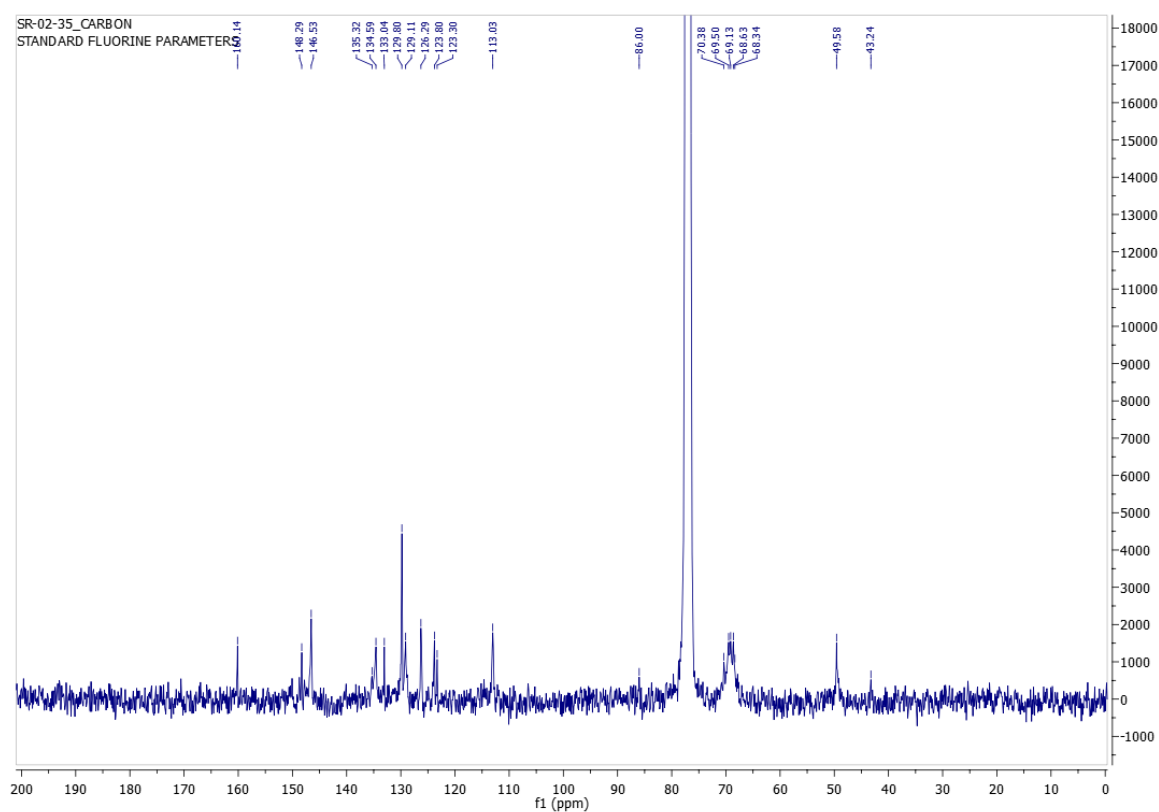

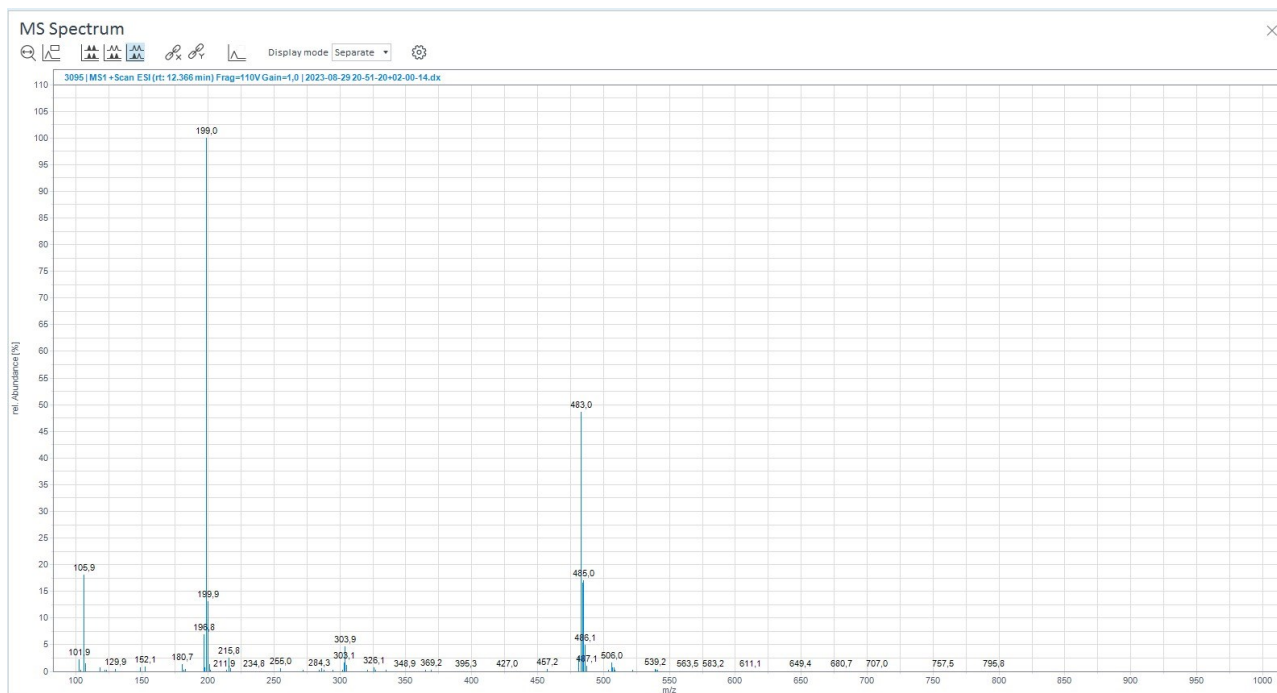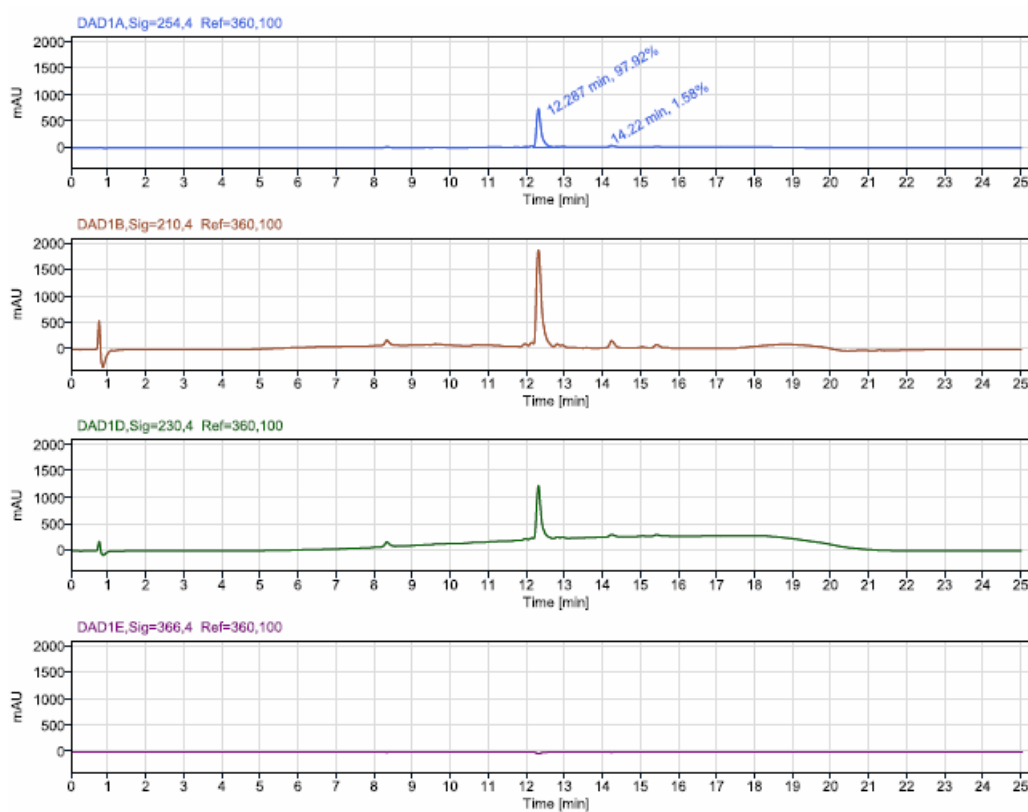

#### Peak Results (Area Percent at least 1%)

| RT (min) | Signal Description                   | Width (min) | Area      | Height   | Area%  |
|----------|--------------------------------------|-------------|-----------|----------|--------|
| 12.287   | DAD1A, Sig=254,4 Ref=360,100         | 0.524       | 6154.9    | 729.0    | 97.92  |
| 12.366   | MS1 +TIC SCAN ESI Frag=110V Gain=1.0 | 0.184       | 6862495.4 | 896087.9 | 100.00 |
| 14.220   | DAD1A, Sig=254,4 Ref=360,100         | 0.158       | 99.4      | 17.2     | 1.58   |

**<sup>1</sup>H, <sup>13</sup>C NMR and HPLC/MS spectra of compound 11f**

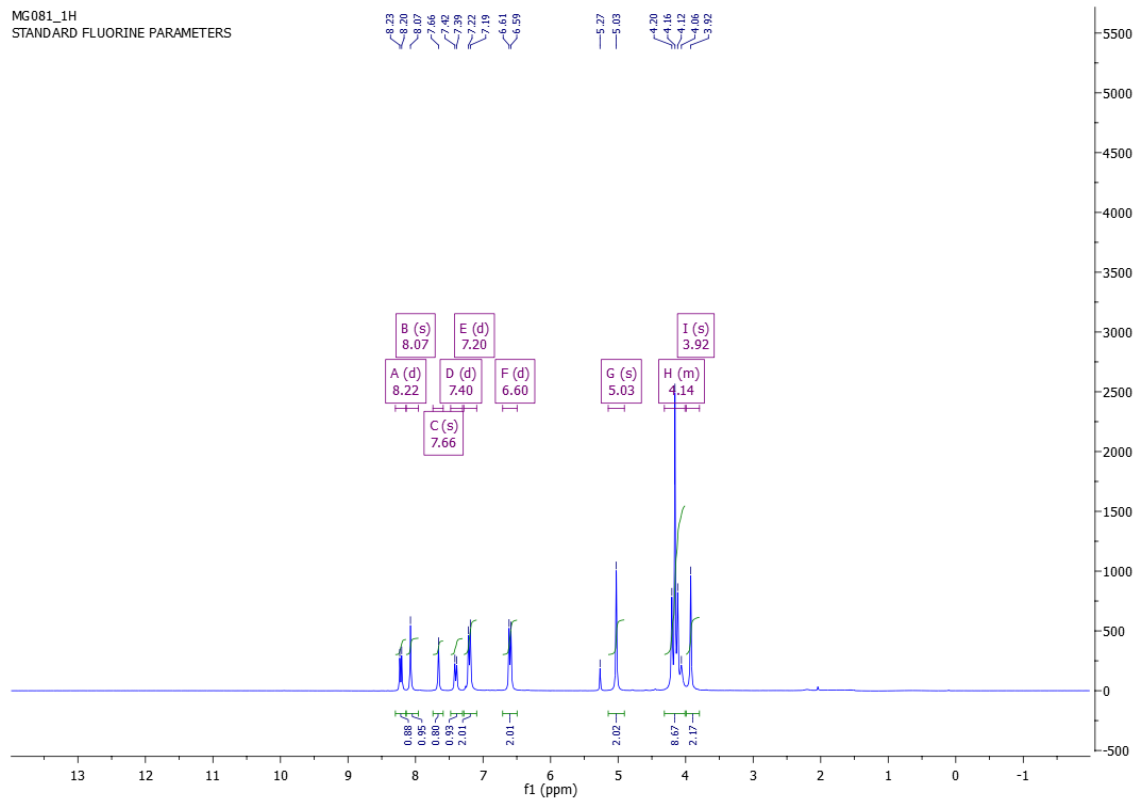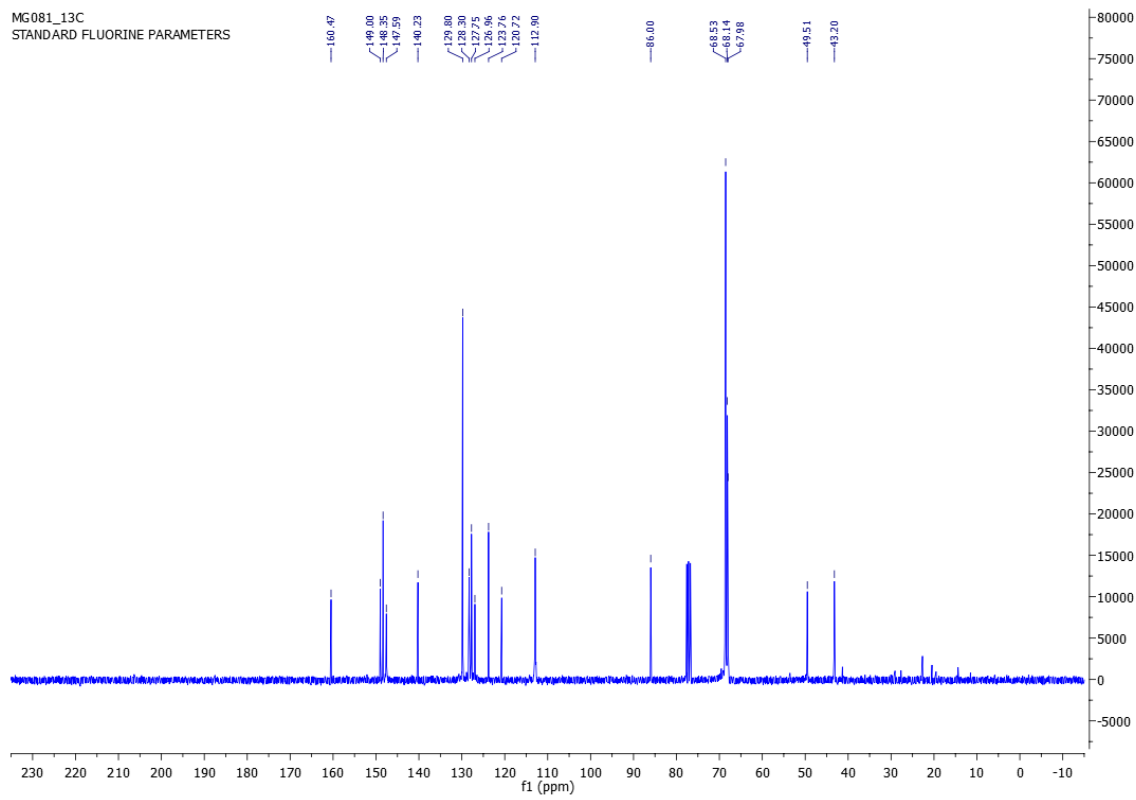

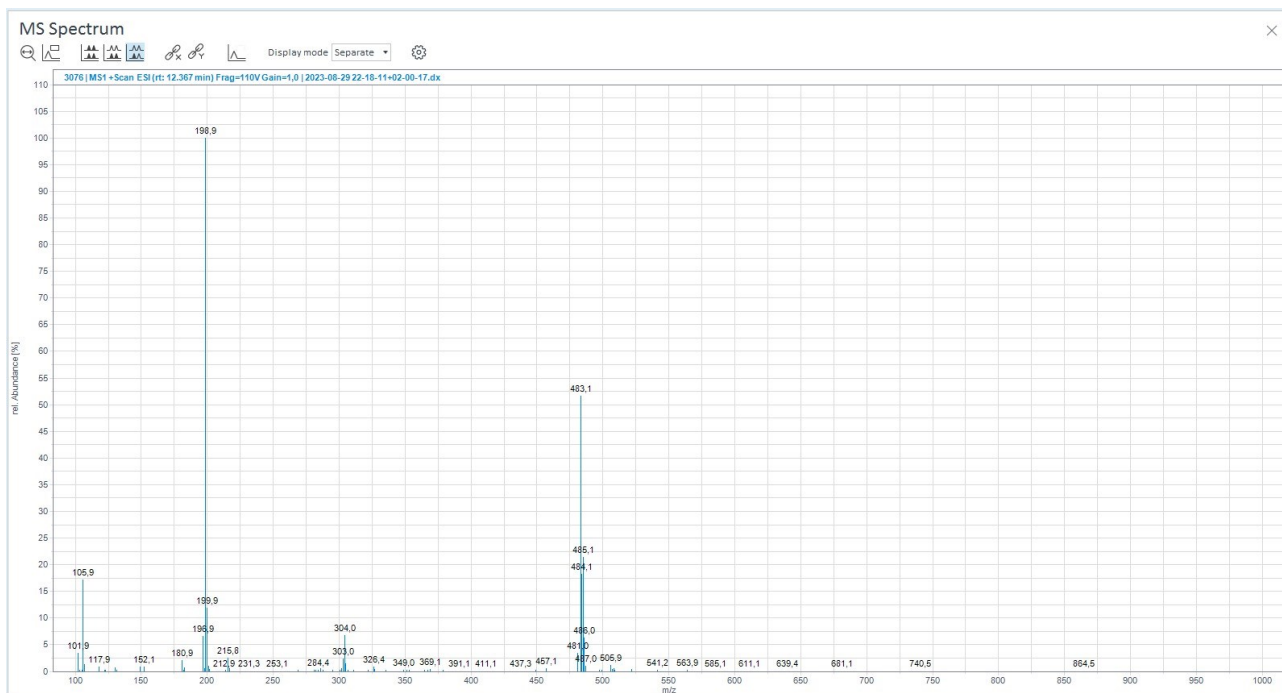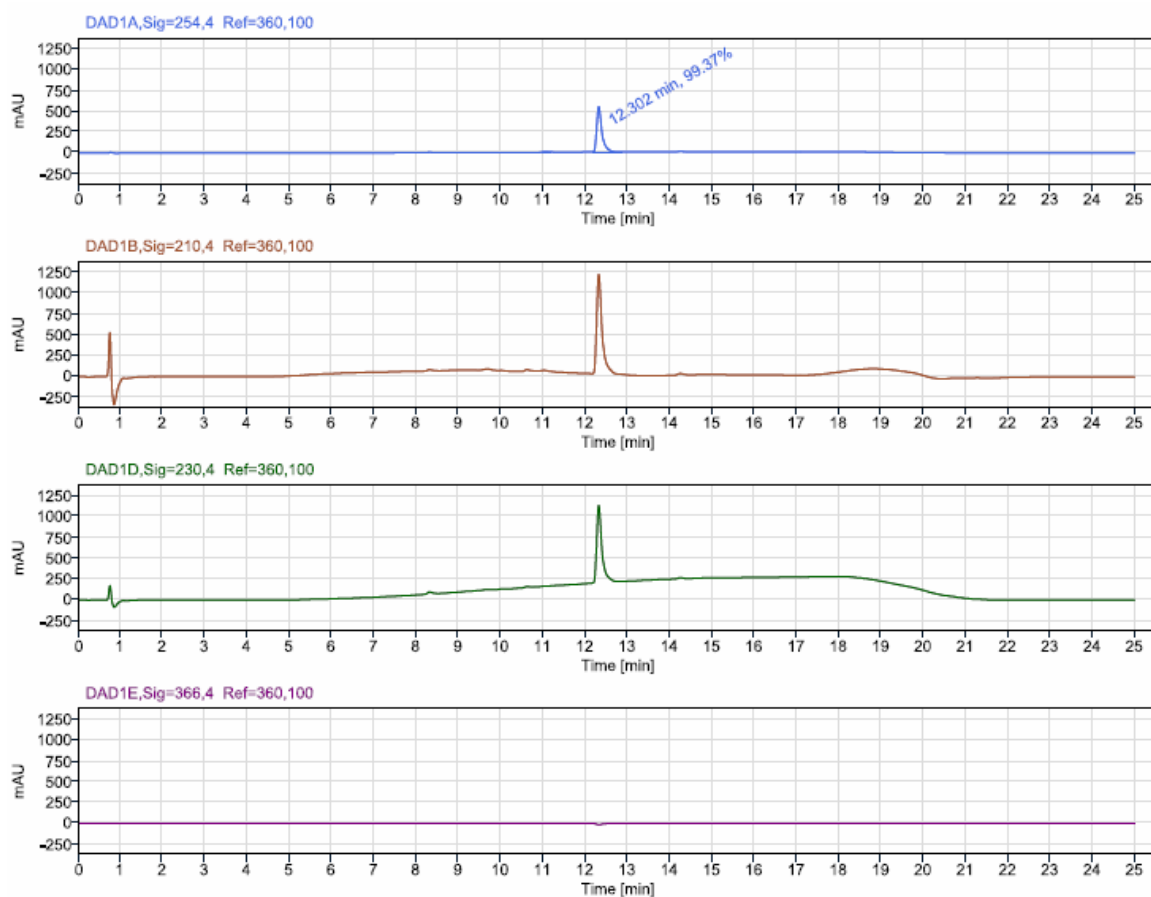

#### Peak Results (Area Percent at least 1%)

| RT (min) | Signal Description                   | Width (min) | Area      | Height   | Area%  |
|----------|--------------------------------------|-------------|-----------|----------|--------|
| 12.302   | DAD1A, Sig=254,4 Ref=360,100         | 0.669       | 4656.8    | 541.3    | 99.37  |
| 12.364   | MS1 +TIC SCAN ESI Frag=110V Gain=1.0 | 0.106       | 1641912.5 | 363973.6 | 100.00 |

# $^1\text{H}$ , $^{13}\text{C}$ NMR and HPLC/MS spectra of compound 22a

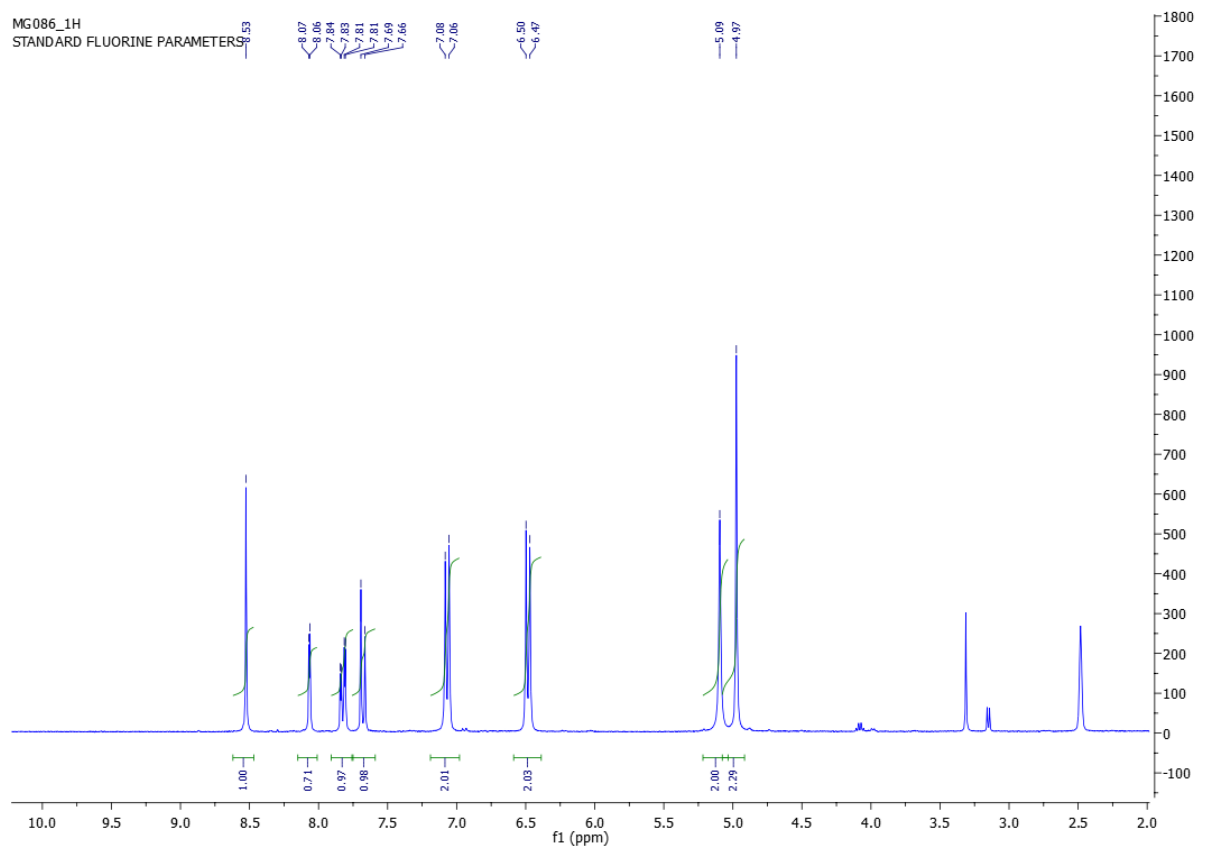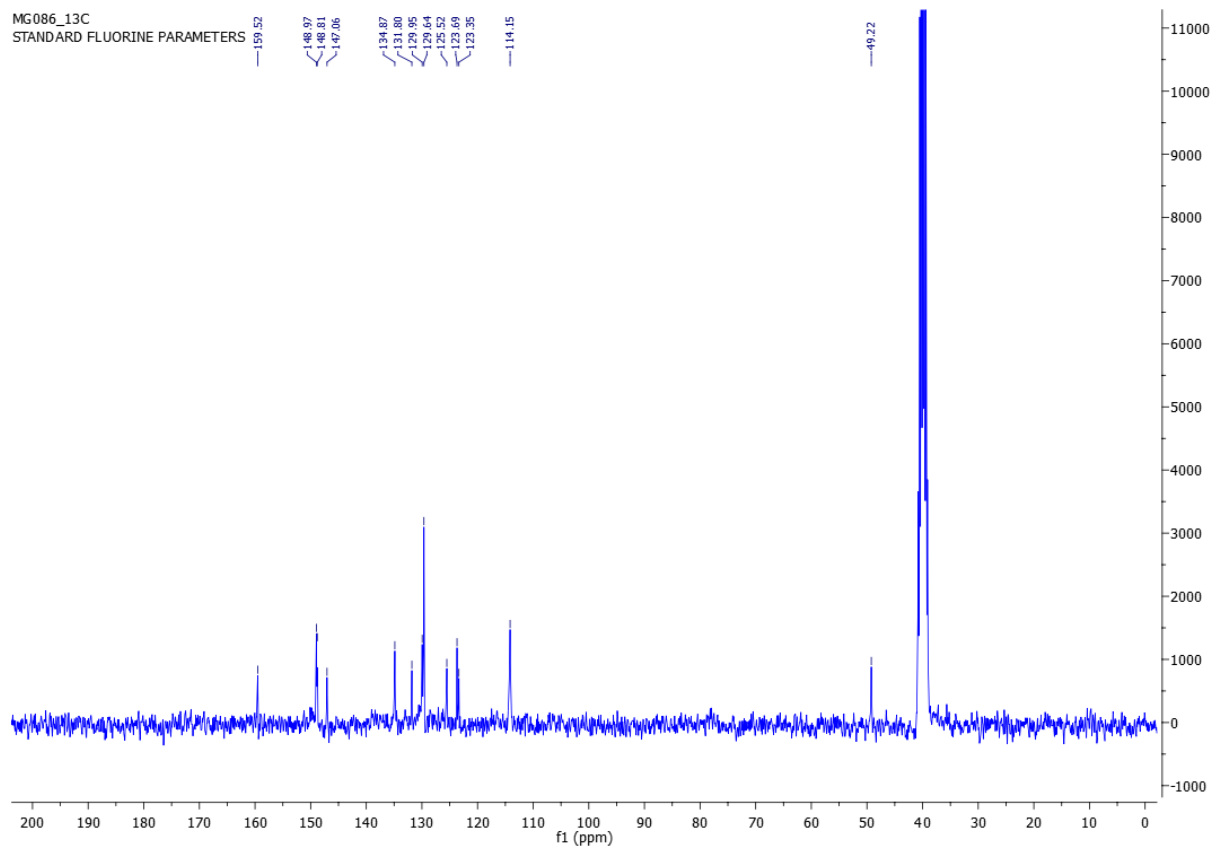

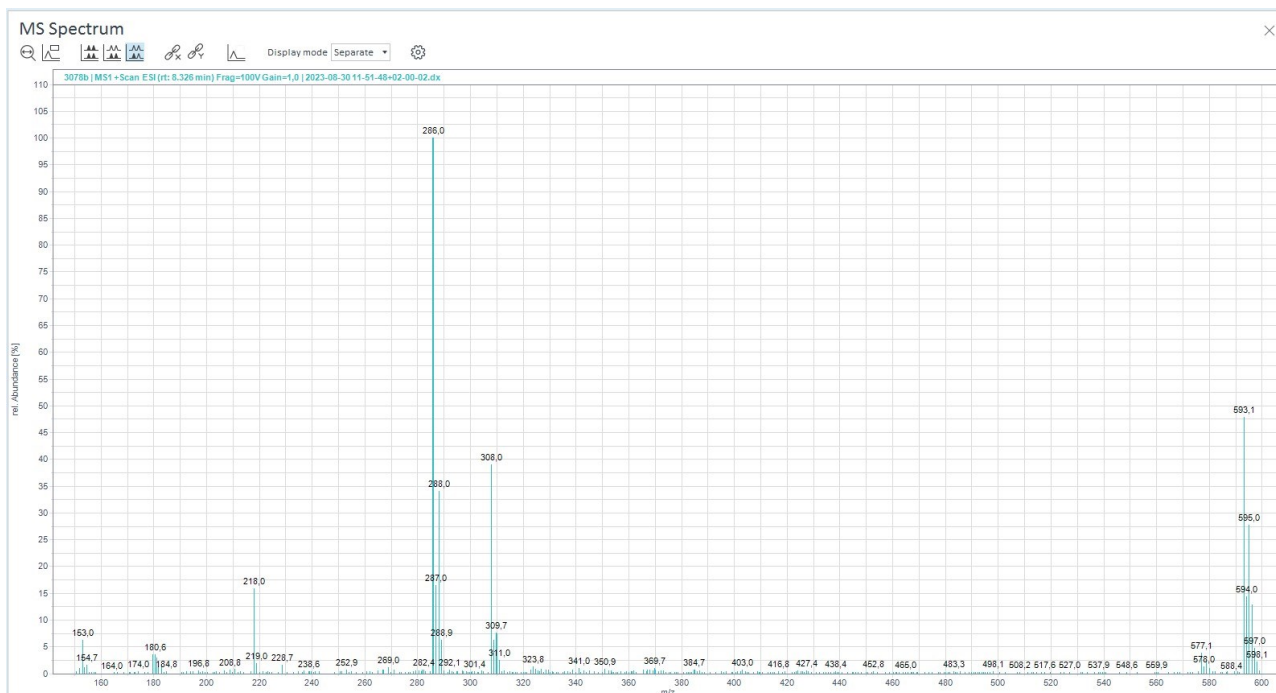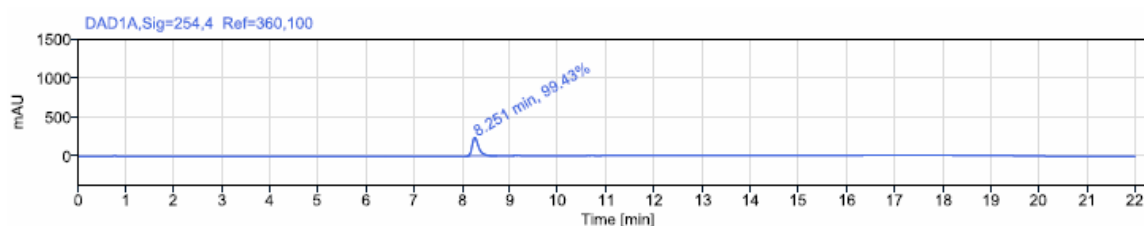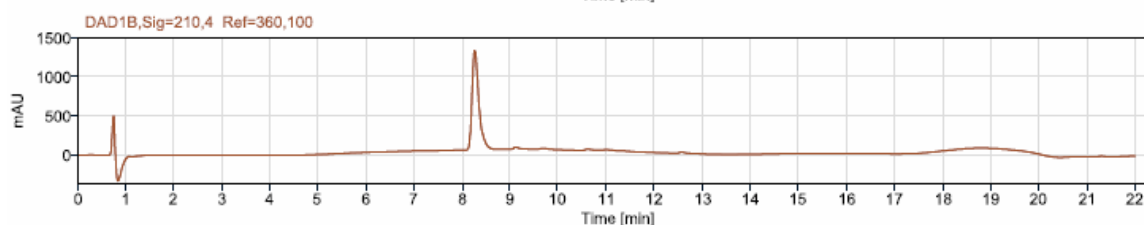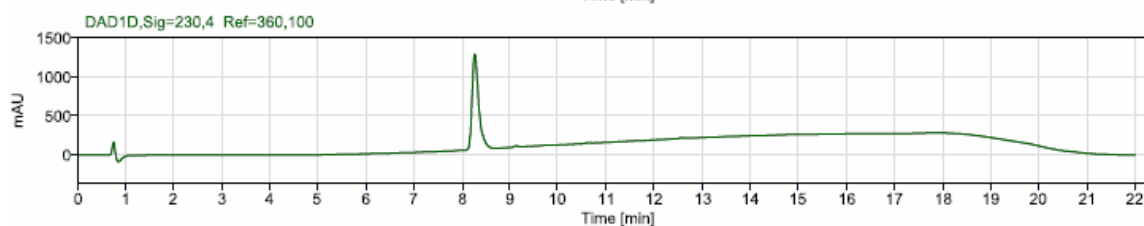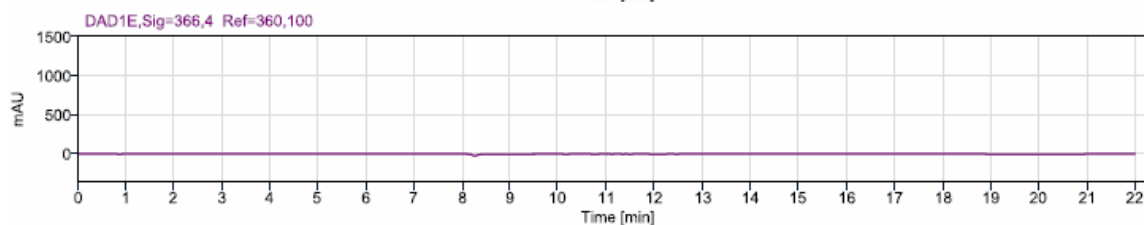

#### Peak Results (Area Percent at least 1%)

| RT (min) | Signal Description                   | Width (min) | Area      | Height   | Area%  |
|----------|--------------------------------------|-------------|-----------|----------|--------|
| 8.251    | DAD1A, Sig=254,4 Ref=360,100         | 0.663       | 2282.5    | 239.0    | 99.43  |
| 8.324    | MS1 +TIC SCAN ESI Frag=100V Gain=1.0 | 0.418       | 3273900.3 | 329227.4 | 100.00 |
| 8.326    | MS1 +TIC SIM ESI Frag=100V Gain=1.0  | 0.461       | 948102.5  | 83126.0  | 100.00 |
| 8.361    | MS1 -TIC SCAN ESI Frag=100V Gain=1.0 | 0.676       | 268240.5  | 18259.0  | 100.00 |

**<sup>1</sup>H, <sup>13</sup>C NMR and HPLC/MS spectra of compound 22b**

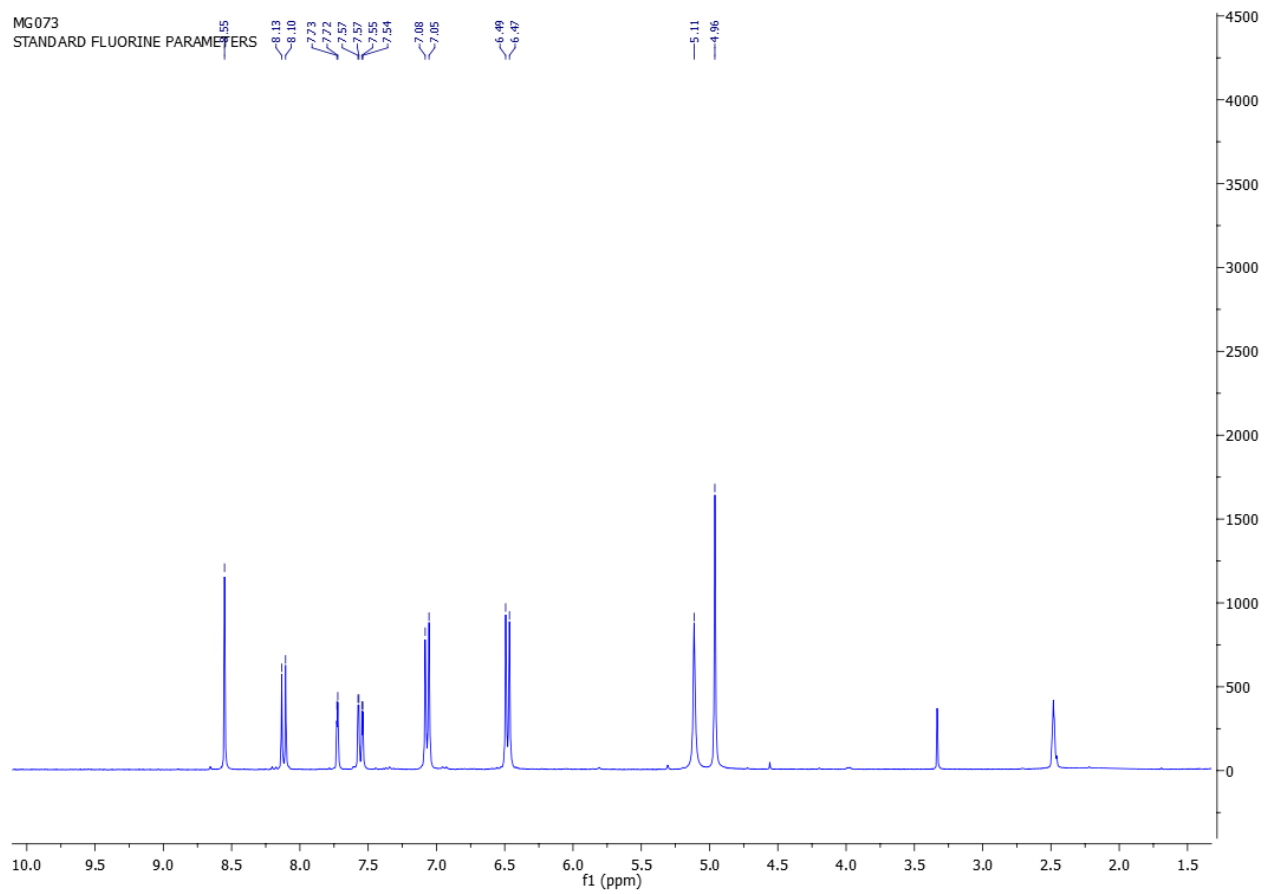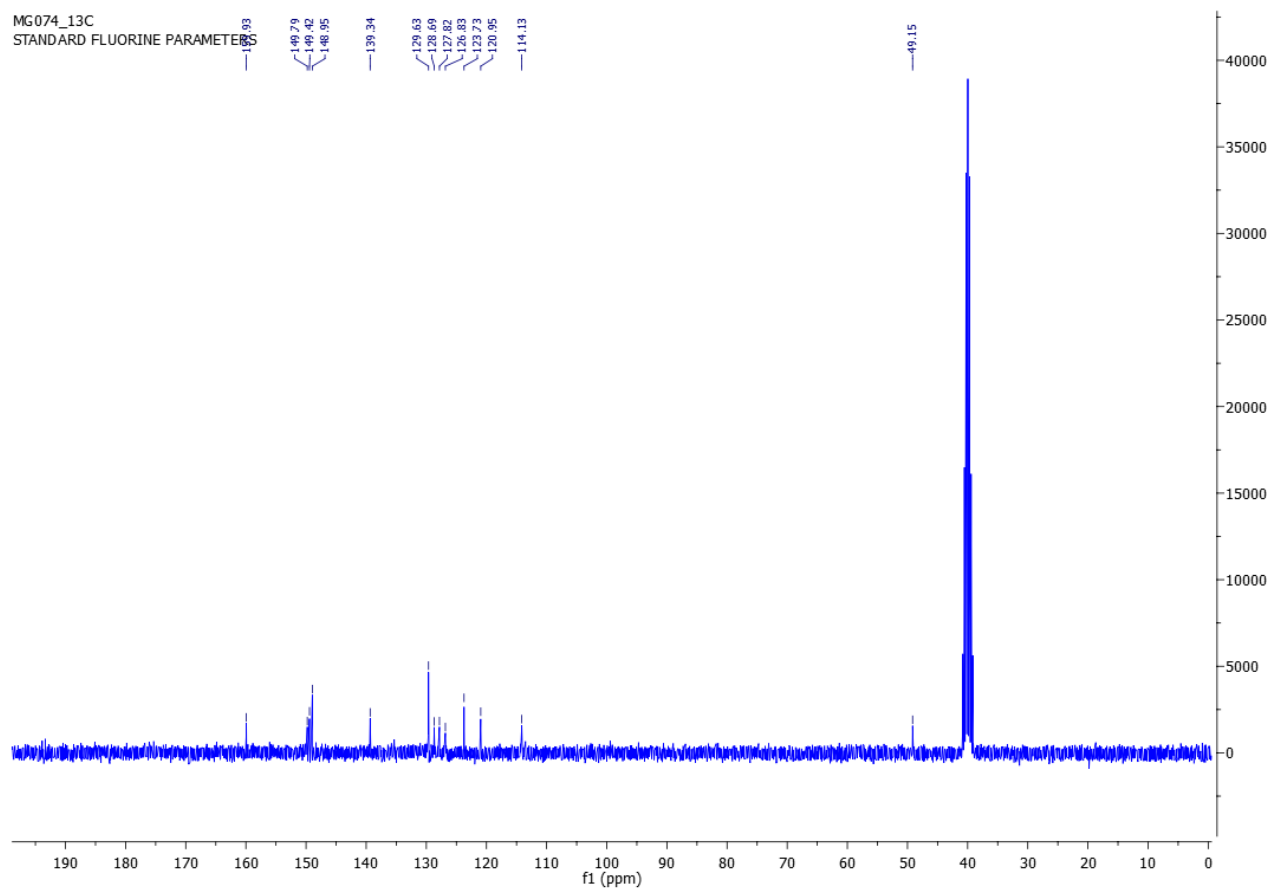



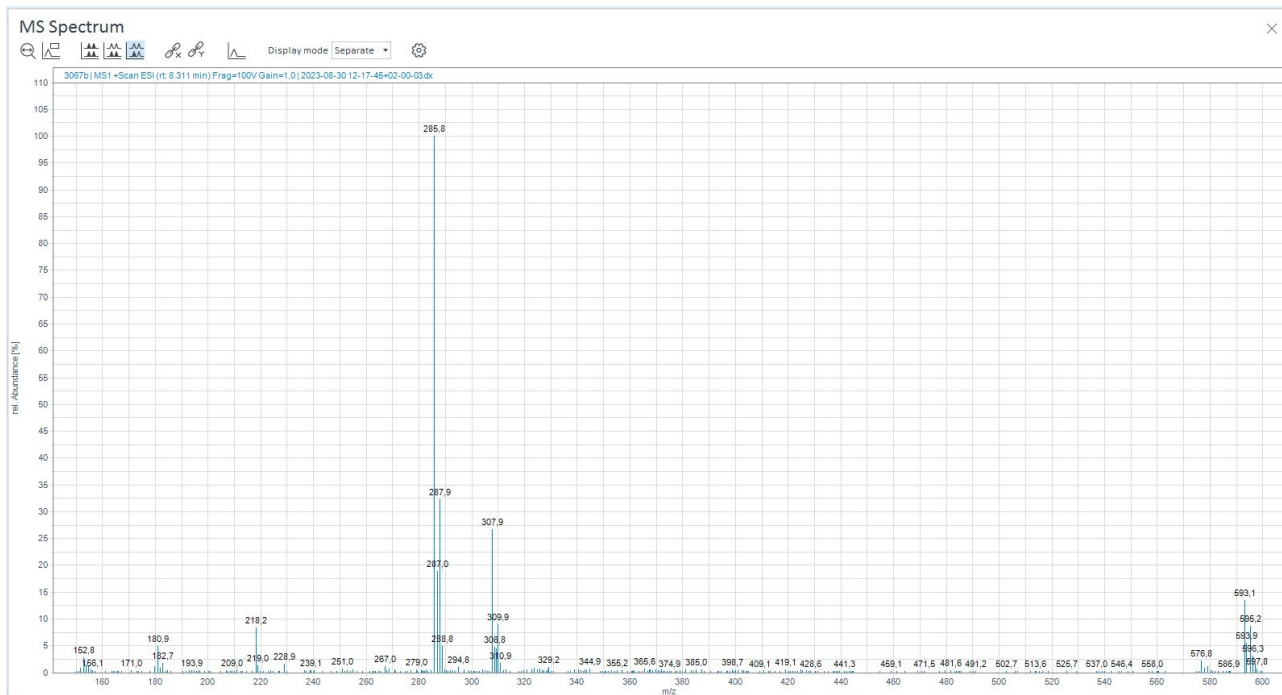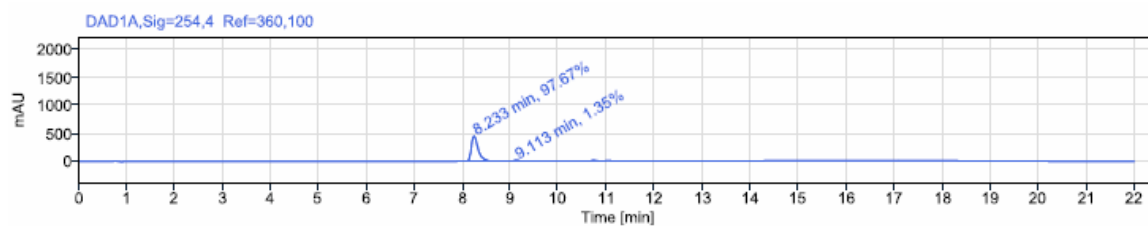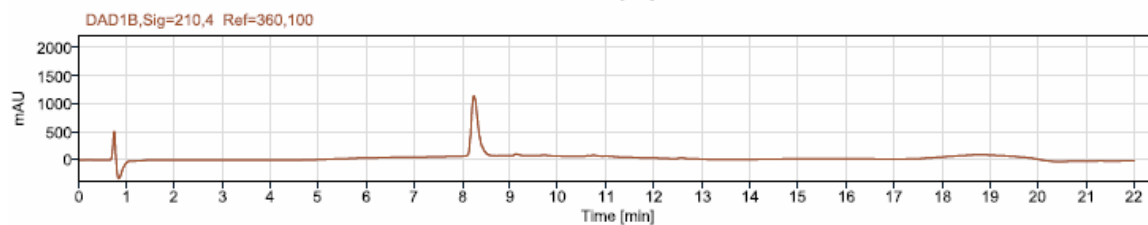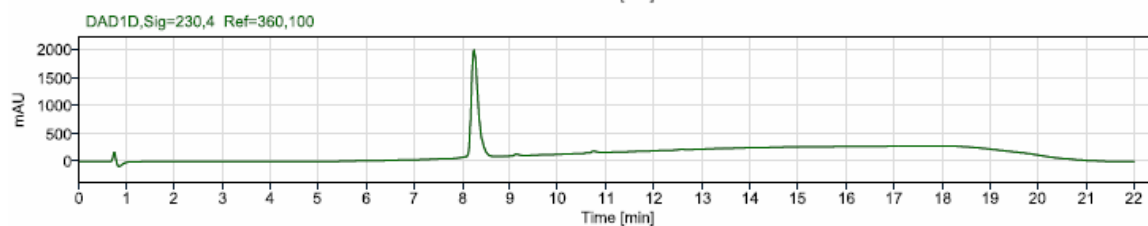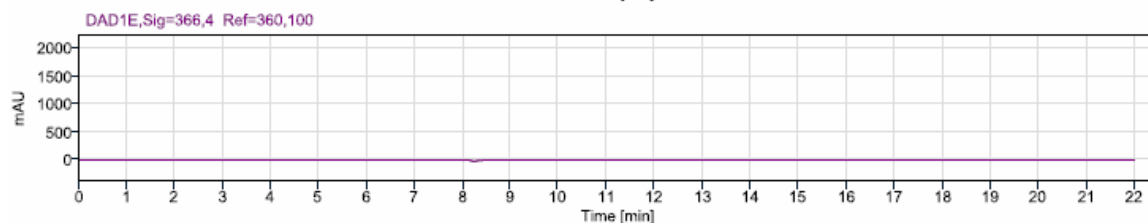

#### Peak Results (Area Percent at least 1%)

| RT (min) | Signal Description                   | Width (min) | Area      | Height   | Area%  |
|----------|--------------------------------------|-------------|-----------|----------|--------|
| 8.233    | DAD1A,Sig=254,4 Ref=360,100          | 0.740       | 4456.3    | 450.0    | 97.67  |
| 8.304    | MS1 +TIC SIM ESI Frag=100V Gain=1.0  | 1.183       | 1243736.5 | 101700.5 | 100.00 |
| 8.309    | MS1 +TIC SCAN ESI Frag=100V Gain=1.0 | 0.718       | 3806960.1 | 301412.0 | 100.00 |
| 9.113    | DAD1A,Sig=254,4 Ref=360,100          | 0.142       | 61.7      | 13.0     | 1.35   |

HRMS spectrum of compound 7a

NF3033 #18 RT: 0.14 AV: 1 NL: 9.38E6  
T: FTMS + p ESI Full ms [216.00-900.00]

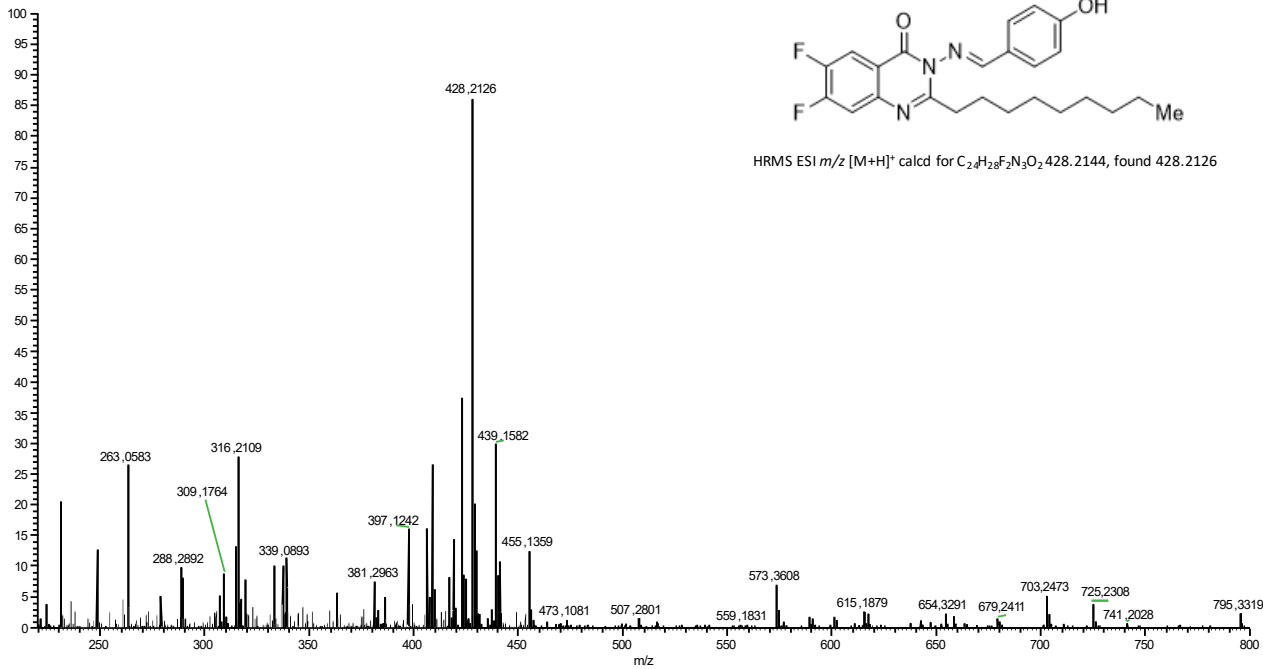

HRMS spectrum of compound 11a

NF3088 #33 RT: 0.26 AV: 1 NL: 5.92E7  
T: FTMS + p ESI Full ms [216,00-800,00]

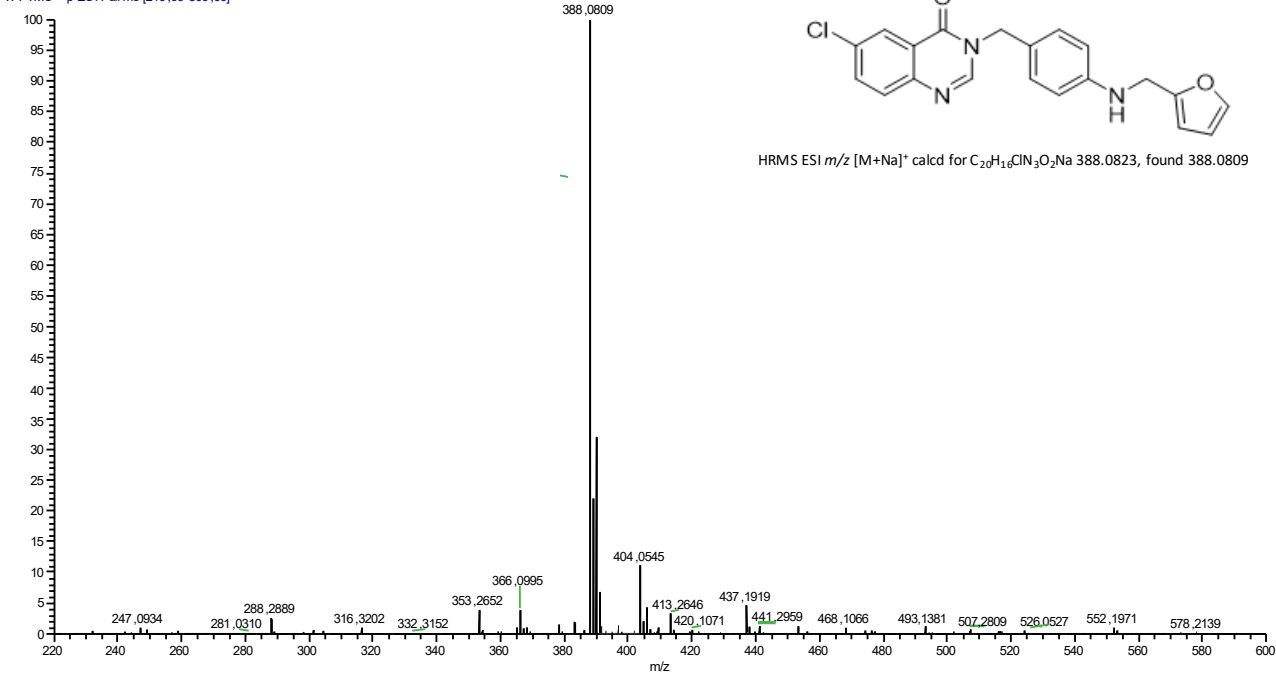

HRMS spectrum of compound 11b

NF3072 #83 RT: 0.65 AV: 1 NL: 2.53E6  
T: FTMS + p ESI Full ms [216.00-900.00]

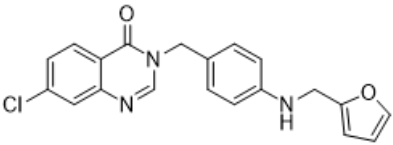

HRMS ESI  $m/z$   $[M+H]^+$  calcd for  $C_{20}H_{17}ClN_3O_2$  366.1004, found 366.0993  
 $[M+Na]^+$  calcd for  $C_{20}H_{16}ClN_3O_2Na$  388.0829, found 388.0807

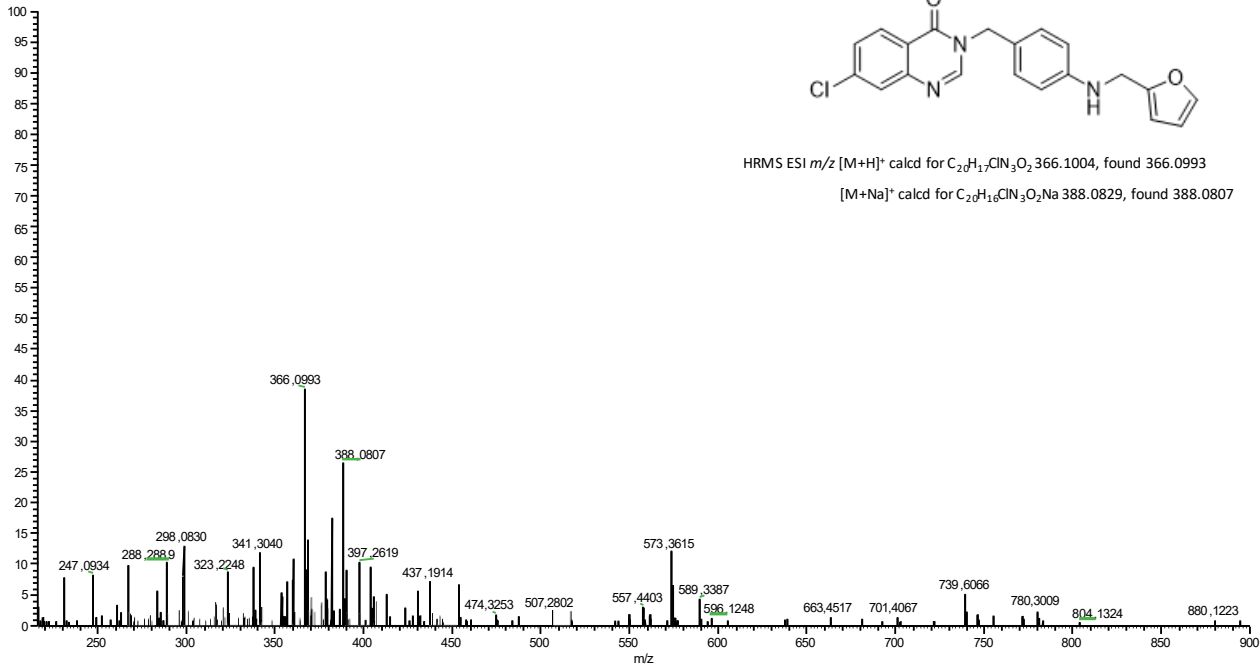

HRMS spectrum of compound 11c

NF3081 BIS H2O #2 RT:0.01 AV: 1 NL: 8,31E6  
T: FTMS + p ESI Full ms [216,00-900,00]

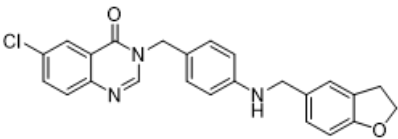

HRMS ESI  $m/z$   $[M+H]^+$  calcd for  $C_{24}H_{21}ClN_3O_2$  418.1317, found 418.1302

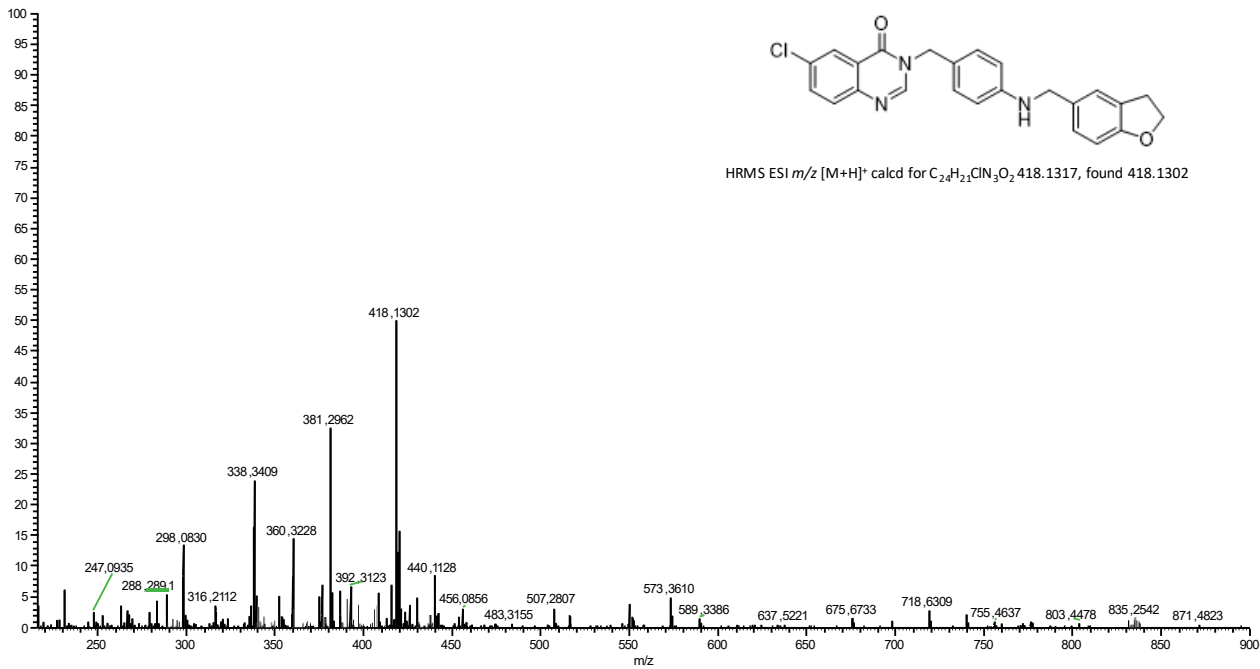

HRMS spectrum of compound 11d

NF3077 #38 RT: 0.30 AV: 1 NL: 4,26E6  
T: FTMS + p ESI Full ms [216,00-800,00]

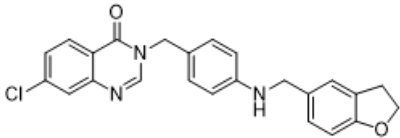

HRMS ESI  $m/z$   $[M+H]^+$  calcd for  $C_{24}H_{21}ClN_3O_2$  418.1317, found 418.1304

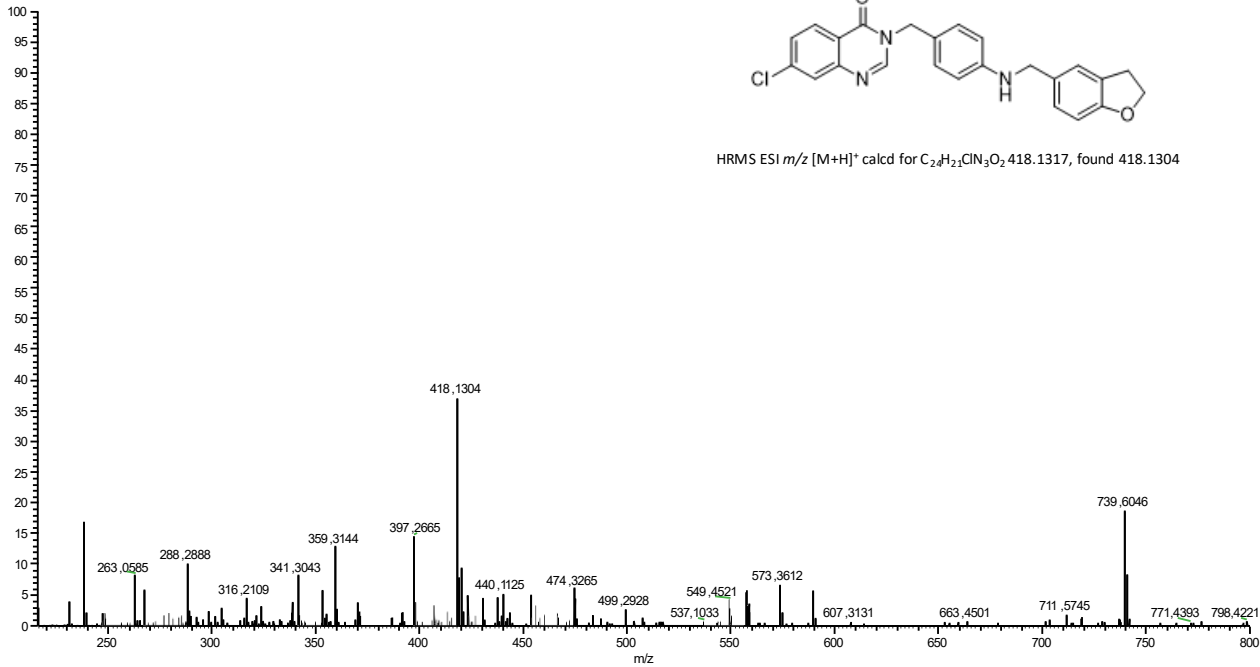

Supplement: s1 [file s1]
