# Supplementary material for: Development of Quinazolinone Derivatives as Modulators of Virulence Factors of Pseudomonas aeruginosa Cystic Fibrosis Strains
Source: MDPI journal article supplement (doi:10.3390/molecules28186535), 2023-09-09
Supplement: s1 [file s1]

Manuscript ID:

Submitting Author:

[illegible]

Note: insert the relevant information and select only the techniques used in this study. In the empty columns you can insert any additional methods.

[illegible]

[illegible]

[illegible]

[illegible]
